24 with little to no unintended off-target mutations detected. This study demonstrates that the use of  
25 Cas9 protein, rather than Cas9 mRNA, results in a higher editing efficiency in bovine embryos  
26 while lowering the level of mosaicism. However, further optimization must be carried out for the  
27 CRISPR/Cas9 system to become feasible for single-step embryo editing in a commercial system.

## 28 **INTRODUCTION**

29 CRISPR-mediated genome editing in livestock zygotes offers an attractive approach to  
30 introduce useful genetic variation into the next generation of cattle breeding programs. However,  
31 genetic mosaicism is particularly problematic for CRISPR-mediated genome editing in developing  
32 zygotes<sup>1,2</sup>. Genetic mosaicism complicates phenotypic analysis of F0 animals and may complicate  
33 screening multiple founders and breeding mosaic founders to produce an F1 generation. While this  
34 is routine in plant and mouse research, such approaches are time-consuming and essentially cost-  
35 prohibitive in large food animal species with long generation intervals like cattle.

36 A limited number of genome editing studies have been reported in bovine zygotes<sup>3</sup>, and  
37 indicate the frequent production of mosaic embryos. The frequency of mosaicism varies depending  
38 upon the type of site-directed nuclease used, the timing of editing relative to embryonic  
39 development, the form and efficiency of the targeting reagents, the intrinsic properties of the target  
40 locus, and the method of delivery<sup>1</sup>.

41 Correspondingly, there are a number of experimental variables that need to be optimized  
42 to improve the efficiency of obtaining non-mosaic, homozygous genome edited founder cattle. In  
43 this study, we focused on the type of CRISPR/Cas9 system delivered (i.e. mRNA or protein) and  
44 report the impact on mutation efficiency, levels of mosaicism, and off-target mutations based on  
45 next generation sequencing when using CRISPR-mediated genome editing of bovine zygotes.

46

## 47 RESULTS

### 48 Guide construction and testing

49 To determine the optimal parameters for CRISPR/Cas9-mediated genome editing in bovine  
50 zygotes, efficiency following microinjection was investigated for three gRNA per locus on three  
51 different chromosomes. Three gRNAs were designed targeting the POLLED locus on  
52 chromosome 1, a safe harbor locus (H11) on chromosome 17 and a locus (ZFX) on the X-  
53 chromosome downstream of the Zinc Finger, X-linked gene (Supplementary Information, Table  
54 S1). Three gRNAs per locus were independently injected alongside Cas9 protein in groups of 30  
55 zygotes, 18 hours post insemination (hpi). Groups of 50 non-injected embryos were cultured as  
56 controls. The highest mutation rates were 76.9% for gRNA2 targeting the POLLED locus, 83.3%  
57 for gRNA1 targeting the H11 locus, and 77.8% for gRNA3 targeting the ZFX locus  
58 (Supplementary Information, Table S2;  $\chi^2$  test,  $P < 0.05$ ). Overall, there was a decrease in the  
59 number of embryos that reached the blastocyst stage as the rate of mutation for a given gRNA  
60 increased. For each locus, the gRNA with the highest mutation rate was associated with the lowest  
61 developmental rate (Supplementary Information, Table S2). gRNAs with the highest mutation rate  
62 were selected for further analysis.

63 Guides targeting the POLLED locus, the H11 locus and the ZFX locus were then injected  
64 in groups of 30 *in vitro* fertilized embryos 18hpi alongside either Cas9 mRNA or protein (Table  
65 1). While there was no significant difference in development to the blastocyst stage when  
66 comparing embryos injected with Cas9 mRNA (16.2%) or Cas9 protein (16.4%), there was a  
67 significant decrease in the proportion of zygotes reaching the blastocyst stage for both groups  
68 compared to non-injected controls (30.7%; Fig. 1a;  $\chi^2$  test,  $P < 0.05$ ). Mutation rates were

69 significantly higher for Cas9 protein (84.2%) compared to Cas9 mRNA (68.5%) (Fig. 1b;  $\chi^2$  test,  
70  $P < 0.05$ ) for all three loci located on different chromosomes (Fig. 1c).

### 71 **Evaluation of mosaicism and off-target insertions and deletions**

72 To evaluate the level of mosaicism, 69 blastocysts (19 gRNA2 targeting the POLLED locus  
73 (10 Cas9 mRNA, 9 Cas9 protein), 26 gRNA1 targeting the H11 locus (11 Cas9 mRNA, 15 Cas9  
74 protein), and 24 targeting the ZFX locus (13 Cas9 mRNA, 11 Cas9 protein)) were collected,  
75 barcoded by PCR amplification and sequenced on a PacBio sequencer (Supplementary  
76 Information, Table S3). Consensus sequences were called from raw reads using circular consensus  
77 sequencing (ccs) with a minimum of 3 passes, a minimum predicted accuracy of 99% and a  
78 maximum length of 700bp (Supplementary Information, Table S4). Unsorted ccs reads were  
79 aligned to each of the target sequences to analyze the types of insertions/deletions (indels)  
80 surrounding the predicted cut site with 26,460 reads aligned to the POLLED target site; 78,305  
81 reads aligned to the H11 target site; and 66,780 reads aligned to ZFX target site (Supplementary  
82 Information, Table S5). About half of the aligned sequences for the POLLED locus were wild type  
83 sequences (47.8%), while almost three quarters of the H11 and ZFX reads were wild type  
84 sequences (75.7% and 71.3%, respectively). The primary indels for reads aligned to the POLLED  
85 locus were 7bp deletion (1672 reads), 11bp deletion (1751), 4bp deletion (6356 reads) and 1bp  
86 insertion (2250 reads); aligned to the H11 locus were 11bp deletion (3246 reads), 6bp deletion  
87 (3813 reads), 3bp deletion (4091 reads), and 1bp deletion (7853 reads); and aligned to the ZFX  
88 locus were 14bp deletion (4222 reads), 9bp deletion (2998 reads), 3bp deletion (3198 reads), 1bp  
89 deletion (2194 reads) and 1bp insertion (6532 reads) (Supplementary Information, Table S5).

90 Ccs reads were then sorted by barcode and analyzed by individual embryos (Fig. 2). Seven  
91 samples were discarded from further analysis due to a lack of reads following the quality filtering

92 step (Supplemental Table S3). A total of 10 samples contained only wild type sequence (7 Cas9  
93 mRNA and 3 Cas9 protein), resulting in an overall mutation rate of ~84% (Table 2). Of the 62  
94 samples injected 18hpi, four contained only mutated alleles, without evidence for any wild type  
95 sequence. All four samples were from embryos injected with Cas9 protein (Supplementary  
96 Information, Table S6). Three of these samples contained only one allele and were presumably  
97 non-mosaic homozygous, although our analyses could not rule out an unmappable mutation (e.g.  
98 large insertion) at the second allele. Each of the mutated embryos containing more than a single  
99 allele had at least three individual alleles or a disproportion of reads for each allele, for example  
100 75% wildtype and 25% mutant (Supplementary Information, Figure S1), suggesting these embryos  
101 were mosaic rather than heterozygous. This translates to 94.2% mosaicism when injecting Cas9  
102 protein compared to 100% mosaicism when injecting Cas9 mRNA.

103         There was a decreased average number of alleles ( $3.0 \pm 0.4$ ) when targeting the POLLED  
104 locus using Cas9 protein (Fig 1d; Table 2). There was no significant difference in the number of  
105 alleles for the other loci when injecting Cas9 mRNA or protein. However, there was a significant  
106 increase in the number of alleles when comparing polled samples of embryos injected 18hpi with  
107 guides alongside Cas9 mRNA ( $5.23 \pm 0.268$ ), as compared to protein ( $4.23 \pm 0.268$ ) (ANOVA,  $P$   
108  $< 0.05$ ). In addition, there was a significant increase in the percentage of wild type alleles present  
109 when injecting Cas9 mRNA compared to Cas9 protein for each of the three loci (42.5% vs. 9.1%,  
110 70.9% vs. 33.7% and 79.7% vs. 43.5%, respectively;  $P < 0.05$ ).

111         A total of 24 potential off-target sites were predicted across 11 bovine chromosomes (1, 4,  
112 7, 8, 10, 12, 14, 18, 21, 27 and X) (Supplementary Information, Table S7) for the three loci. The  
113 24 predicted off-target sites were PCR amplified, barcoded and sequenced using an Illumina  
114 MiSeq sequencer for each of the 69 samples (Supplementary Information, Table S3). HTStream

115 processed reads were aligned to the 24 predicted sites with 10,399,614 reads mapped with  
116 coverage ranging from 1X to 112X per sample per site (Supplementary Information, Table S7).  
117 Genetic variation was found throughout the samples in each of the 24 predicted off-target sites  
118 with almost no indels present at the predicted off-target cut site with the exception of two targets.  
119 A 12bp deletion 26bp downstream from a predicted off-target cut site for the H11 gRNA targeting  
120 chr1: 7454978 was detected in 69,434 reads (6.8%) (Supplemental Information, Table S7).  
121 Additionally, 2,397 reads (0.51%) contained a 3bp deletion 11bp downstream from the predicted  
122 off-target cut site of the ZFX gRNA target chr21: 28506796 (Supplemental Information, Table  
123 S7).

## 124 **DISCUSSION**

125 The ability to efficiently generate non-mosaic, homozygous founder animals is important  
126 for the production of genome edited livestock. The use of the CRISPR/Cas9 system has been  
127 reported across many livestock species<sup>3</sup>, but few reports have characterized its use in bovine  
128 embryos. In this study, using the CRISPR/Cas9 system, we identified gRNAs that resulted in high  
129 rates of mutation at target locations in two autosomes and the X chromosome in bovine embryos  
130 with an overall high efficiency (81-90%). Significant differences were observed in gRNA  
131 efficiency within a locus, but not between loci. Microinjection of CRISPR/Cas9 editing reagents  
132 in zygotes reduced development to the blastocyst stage compared to non-injected controls.  
133 However, no difference was observed in the number of embryos that reached the blastocyst stage  
134 when comparing embryos injected with Cas9 mRNA or protein (16.2% vs. 16.4%). This finding  
135 was important because we observed a significantly higher rate of mutation in blastocysts when  
136 injecting Cas9 protein compared to Cas9 mRNA (84.2% and 68.5%, respectively). This difference  
137 is likely due to the immediate availability of the gRNA/Cas9 ribonucleoprotein (RNP) complex to

138 induce mutation in the embryo. When Cas9 mRNA is injected, there is a delay in genome editing  
139 as Cas9 mRNA must be translated into protein before it can combine with the gRNA to induce a  
140 DSB<sup>4</sup>.

141 Mosaicism, the presence of more than two alleles in an individual, is a common problem  
142 in livestock genome editing<sup>5</sup>, with a high rate of embryos resulting in multiple alleles (Table 3).  
143 Studies utilizing transcription activator-like effector nucleases (TALENs) have demonstrated  
144 lower mosaicism rates than we observed here; however, the proportion of edited embryos tends to  
145 be lower as well<sup>6,7</sup>. A study employing a zinc finger nuclease (ZFN) in bovine embryos  
146 demonstrated both high embryo editing efficiency and mosaicism rates as compared to those found  
147 in TALEN edited embryos<sup>8</sup>. However, the prevalence of mosaicism was reduced when injecting  
148 embryos at 8hpi compared to 18hpi, before S-phase had occurred<sup>8</sup>. While we were able to induce  
149 mutations in embryos at a high rate, we also observed a high level of mosaicism when injecting  
150 18hpi. Many studies of editing in livestock zygotes similarly report high levels of mosaicism when  
151 utilizing CRISPR/Cas9 (Table 3). Many of these studies characterized mosaicism by sequencing  
152 the PCR amplicon of the genomic regions flanking the gRNA target sequence and then  
153 decomposing the resulting chromatogram data with the TIDE bioinformatics package<sup>9</sup>. Although  
154 this approach is cost-effective and rapid, next generation sequencing of the PCR products allows  
155 for a more accurate characterization of the different alleles that are present in a mosaic individual,  
156 and their relative abundance<sup>10</sup>.

157 In bovine embryos, DNA replication occurs approximately 12-14 hours after fertilization<sup>11</sup>.  
158 When injecting at 18hpi, as is often done when using traditional *in-vitro* fertilization (IVF)  
159 protocols, most zygotes would be expected to have completed DNA replication<sup>12</sup> and there would  
160 likely be more than two copies of each chromosome, thus more opportunities for multiple genomic

161 edits to occur, resulting in mosaicism. Additionally, following cytoplasmic injection, the  
162 gRNA/Cas9 ribonucleoprotein (RNP) complex needs time to enter the nucleus, find its target and  
163 cleave the DNA. Furthermore, if injecting Cas9 mRNA, translation to Cas9 protein must also  
164 occur, further delaying the editing process, thus resulting in a higher rate of mosaicism. It has been  
165 suggested that injection of the CRISPR/Cas9 RNP prior to the S-phase of DNA replication could  
166 reduce mosaicism<sup>1</sup>.

167 One recent study with bovine embryos reported low rates (~30%) of mosaicism when  
168 introducing Cas9 RNA or protein into early stage zygotes (0 or 10hpi) prior to the S-phase of DNA  
169 replication<sup>12</sup>. In that study, allele identification was first made by Sanger sequencing of an  
170 amplicon of the targeted region, and then by clonal sequencing of 10 colonies derived from the  
171 PCR product per embryo. PCR and cloning-based approaches can identify that a range of alleles  
172 exist but cannot accurately quantitate the abundance of each allelic species. The authors went on  
173 to employ next generation sequencing on 20 embryos per group to characterize the alleles in non-  
174 mosaic embryos. The authors considered embryos that contained biallelic mutations resulting in a  
175 gene knockout to be non-mosaic, regardless of the proportion of alleles.

176 In the current study, we employed next generation sequencing to quantitate the abundance  
177 of each allele. The fact that we observed multiple alleles occurring in only a small percentage of  
178 reads (< 25%) in many samples analyzed in this study (Figure 2) suggests that editing continued  
179 in some subset of cells after the first cleavage division. Further, we considered an embryo  
180 containing more than one population of genetically distinct cells to be mosaic irrespective of  
181 whether the edit resulted in a missense or nonsense mutation. It is important to determine if founder  
182 animals are mosaic because mosaicism complicates the interpretation of the effect of a given  
183 genome alteration<sup>5</sup>, and subsequent breeding of mosaic founder animals to achieve non-mosaic



184 animals can take years<sup>13</sup>. Additionally, mosaics do not fit easily into the proposed regulatory  
185 framework for genome edited food animals<sup>14</sup>.

186 Along with the level of mosaicism, one of the concerns raised with the generation of  
187 genome edited animals is the potential for off-target mutation events. Typically, online prediction  
188 tools are used to calculate the likelihood of off-target sites<sup>15-17</sup>. The top predicted sites can then be  
189 PCR amplified and the presence of a mutation determined by either next generation sequencing,  
190 TA cloning followed by Sanger sequencing, or mismatch cleavage assays followed by Sanger  
191 sequencing<sup>18</sup>. In this study, we used the targeted approach using online predictive tools to identify  
192 off-target sites rather than a genome-wide approach. Off-target cleavage can occur in the genome  
193 with three to five base pair mismatches in the PAM-distal sequence<sup>15,19-21</sup>. Cas9 specificity is  
194 determined by the seed region, or the 8 to 11-nt PAM-proximal sequence, making it the most vital  
195 part of the gRNA sequence<sup>19,22</sup>. In our gRNA design, we excluded all gRNAs with less than three  
196 mismatches across the off-target sequence. We determined this threshold based on previous studies  
197 showing reduced Cas9 activity in regions with at least three mismatches<sup>23</sup>.

198 In the 69 samples analyzed, there were two potential off-target mutations detected. One of  
199 these (H11) was in a region that had known annotated wild type 12bp deletions (rs876383581 and  
200 rs521367917) around the potential cut-site. Additionally, 0.51% of total reads contained a 3bp  
201 deletion 11bp downstream from the predicted off-target cut site for the ZFX gRNA target chr21:  
202 28506796 (Supplemental Information, Table S7). This predicted site does not have any annotated  
203 variation. It is important to note that although this off-target location had three mismatches to the  
204 gRNA sequence, all three of the mismatches were located outside the seed region (8-11bp  
205 upstream of the PAM sequence). This guide was designed using off-target prediction software and  
206 the Btau 4.6.1 bovine reference genome<sup>24</sup>, which was the only *Bos taurus* reference genome

207 available with the online tool at the time. When the off-target prediction software was re-run for  
208 the off-target analysis, the most recent reference genome available was UMD 3.1.1<sup>24</sup>. Using the  
209 new reference genome, this locus on chromosome 21 was identified as having the requisite three  
210 mismatches, but there were no mismatches in the seed region, as specified by our guide design  
211 criteria. More recently, an improved reference bovine genome ARS-UCD1.2 was published<sup>25</sup>.  
212 Using the online tool with the updated reference genome resulted in the same predicted off-target  
213 sites as UMD 3.1.1.

214         One of the stated concerns with off-target mutation events is that if they occur in functional  
215 regions, such as coding sequences or regulatory regions, they could potentially be detrimental to  
216 the health or development of the resulting animal. Neither of these two off-target deletions were  
217 in a region of annotated function. As there were approximately 20 individual blastocysts included  
218 in these analyses, these deletions may also have been the result of naturally occurring polymorphic  
219 variation. A detailed sequence analysis of 2,703 individuals from different breeds of cattle revealed  
220 a high level of genetic diversity including 84 million single-nucleotide polymorphisms (SNPs) and  
221 2.5 million small insertion deletions<sup>26</sup>. Data like these are essential to put naturally occurring  
222 variation, like that seen at the H11 locus, in context. Various studies in humans<sup>27,28</sup>, monkeys<sup>29</sup>,  
223 and rodents<sup>30,31</sup> suggest that the off-target frequency of Cas9-mediated mutagenesis does not differ  
224 from the de novo mutation rate.

225         Overall, we demonstrated efficient CRISPR/Cas9 genome editing across three different  
226 loci on three different chromosomes. We found that injecting zygotes with Cas9 protein results in  
227 a significantly higher mutation rate compared to Cas9 mRNA (82.2% vs 65.4%). In addition,  
228 zygotes injected with Cas9 protein displayed a significantly lower number of alleles compared to  
229 those injected with Cas9 mRNA (4.2 vs 5.2). Although off-target events did not appear to be an

230 issue, the rate of mosaicism was still high, and further optimization needs to be done before this  
231 technique is feasible in a livestock production setting.

232

233

## 234 **MATERIALS AND METHODS**

### 235 **Guide Construction**

236 Guides sequences were designed using the online tools sgRNA Scorer 2.0<sup>32,33</sup> and Cas-  
237 OFFinder<sup>34</sup> and targeting the POLLED locus on chromosome 1, a safe harbor locus (H11) on  
238 chromosome 17 and in the 3' UTR of the Zinc-finger X-linked (*ZFX*) gene (*ZFX*) on the X-  
239 chromosome. Guides were selected with no less than three mismatches in the guide sequence for  
240 off-target sites using the UMD3.1.1 bovine reference genome<sup>24</sup>, and at least one mismatch in the  
241 seed region (8-11bp upstream of the PAM sequence). Oligonucleotides were ordered from  
242 Eurofins USA (Louisville, KY) for the top four guides for construction of the gRNA and were  
243 used for *in vitro* transcription using the AmpliScribe T7-Flash Transcription kit (Lucigen, Palo  
244 Alto, CA) and purified using the MEGAclean Transcription Clean-Up kit (Thermo Fisher,  
245 Chicago, IL) as described by Vilarino et al<sup>10</sup>. Cleavage efficiency was tested using an *in vitro*  
246 cleavage assay by combining 60ng of PCR amplified product, 100ng of gRNA, 150ng of Cas9  
247 protein (PNA Bio, Inc., Newbury Park, CA), 1μL of 10X BSA, 1μL of NEB Buffer 3.1 and water  
248 bringing the total volume to 10μL in a 0.2μL tube and incubating at 37°C for 1 hour. The incubated  
249 product was then run on a 2% agarose gel with 5μL of Sybr Gold at 100V for 1 hour and visualized  
250 using a ChemiDoc-ItTS2 Imager (UVP, LLC, Upland, CA).

### 251 **Embryo Production**

252 Bovine ovaries were collected from a local processing plant and transported to the  
253 laboratory at 35-37°C in sterile saline. Cumulus-oocyte complexes (COCs) were aspirated from  
254 follicles and groups of 50 COCs were transferred to 4-well dishes containing 400µL of maturation  
255 media<sup>35</sup>. COCs were incubated for 21-24hr at 38.5°C in a humidified 5% CO<sub>2</sub> incubator.  
256 Approximately 25 oocytes per drop were fertilized in 60µL drops of SOF-IVF<sup>35</sup> with 1x10<sup>6</sup> sperm  
257 per mL and incubated for 18hr at 38.5°C in a humidified 5% CO<sub>2</sub> incubator. Presumptive zygotes  
258 were denuded by light vortex in SOF-HEPES medium<sup>35</sup> for 5 min. 25 zygotes per drop were  
259 incubated in 50µL drops of KSOM culture media (Zenith Biotech, Glendale, CA, USA) at 38.5°C  
260 in a humidified atmosphere of 5% CO<sub>2</sub>, 5% O<sub>2</sub>, and 90% N<sub>2</sub> for 7-8 days.

## 261 **Guide Testing**

262 Mutation rate for each guide was determined by laser-assisted cytoplasmic injection<sup>36</sup> of  
263 *in vitro* fertilized embryos with 6pL of a solution containing 67ng/µL of *in vitro* transcribed gRNA  
264 alongside 133ng/µL of Cas9 mRNA or 167ng/µL of Cas9 protein (PNA Bio, Inc., Newbury Park,  
265 CA) incubated at room temperature for 30 minutes prior to injection. Injected embryos were  
266 incubated for 7-8 days. Embryos that reached blastocyst stage were lysed in 10µL of Epicenter  
267 DNA extraction buffer (Lucigen, Palo Alto, CA) using a SimpliAmp Thermal Cycler (Applied  
268 Biosystems, Foster City, California) at 65°C for 6 minutes, 98°C for 2 minutes and held at 4°C.  
269 The target region was amplified by two rounds of the polymerase chain reaction (PCR) using  
270 primers developed using Primer3 (Supplementary Information, Table S1)<sup>37,38</sup>. The first round of  
271 PCR was performed on a SimpliAmp Thermal Cycler (Applied Biosystems, Foster City,  
272 California) with 10µL GoTAQ Green Master Mix (Promega Biosciences LLC, San Luis Obispo,  
273 CA), 0.4µL of each primer at 10mM and 9.2µL of DNA in lysis buffer for 5 min at 95°C, 35 cycles  
274 of 30 sec at 95°C, 30 sec at anneal temp (Supplementary Information, Table S1), and 30 sec at

275 72°C, followed by 5 min at 72°C. The second round of PCR was run with 10µL GoTAQ Green  
276 Master Mix (Promega Biosciences LLC, San Luis Obispo, CA), 4.2µL of water, 0.4µL of each  
277 primer at 10mM and 5µL of first round PCR for 3 min at 95°C, 35 cycles of 30 sec at 95°C, 30 sec  
278 at anneal temp (Supplementary Information, Table S1), and 30 sec at 72°C, followed by 5 min at  
279 72°C. Products were visualized on a 1% agarose gel using a ChemiDoc-ItTS2 Imager (UVP, LLC,  
280 Upland, CA), purified using the QIAquick Gel Extraction Kit (Qiagen, Inc., Valencia, CA) and  
281 Sanger sequenced (GeneWiz, South Plainfield, NJ).

## 282 **Allelic Variation and Off-Target Analysis**

283 Embryos that reached the blastocyst stage were lysed and underwent whole-genome  
284 amplification using the Repli-G Mini kit (Qiagen, Inc., Valencia, CA). To determine presumptive  
285 off-target sites, guide sequences were mapped against the bosTau8 bovine reference genome using  
286 the online tool Cas-OFFinder<sup>34</sup>. A total of 24 off-target sites were predicted using the online tool:  
287 eight off-target sites for the POLLED gRNA, eleven off-target sites for the H11 gRNA and five  
288 off-target sites for the ZFX gRNA (Supplementary Information, Table S7). Whole-genome  
289 amplified samples were used for PCR amplification of cut-sites and presumptive off-target sites  
290 using a dual round PCR approach described above to barcode each sample. Primers were designed  
291 to amplify each region using Primer3<sup>37,38</sup> with a 15bp adapter sequence attached to the forward  
292 (AGATCTCTCGAGGTT) and reverse (GTAGTCGAATTCGTT) (Supplementary Information,  
293 S1). The second round of PCR amplified off the adapters adding an independent barcode for each  
294 sample to identify reads for pooled sequencing (Supplementary Information, Table S1).

295 PCR samples targeting the gRNA cut site underwent SMRTbell library preparation and  
296 were sequenced on a PacBio Sequel II sequencer by GENEWIZ, LLC (South Plainfield, NJ, USA).  
297 Consensus sequences were called, reads sorted by barcode and BAM converted to individual

298 FASTQ files using SMRT Link v8.0.0.80529 ([https://www.pacb.com/support/software-](https://www.pacb.com/support/software-downloads/)  
299 [downloads/](https://www.pacb.com/support/software-downloads/)). Reads were aligned to each target site using BWA v0.7.16a<sup>39</sup>. SAM files were  
300 converted to BAM files, sorted and indexed using SAMtools v1.9<sup>40</sup>. Number and types of alleles  
301 were determined for each sample using CrispRVariants v1.12.0<sup>41</sup>.

302 Off-target PCR samples underwent library preparation using the Illumina TruSeq library  
303 kit and were sequenced (300bp paired-end) on an Illumina MiSeq Next Generation Sequencer by  
304 the DNA Technologies and Expression Analysis Cores at the UC Davis Genome Center. Paired-  
305 end reads were processed and overlapped to form high quality single-end reads using HTStream  
306 Overlapper v1.1.0 (<https://github.com/ibest/HTStream>). Processed reads were aligned to each  
307 target site using BWA v0.7.16a<sup>39</sup>. SAM files were converted to BAM files, sorted and indexed  
308 using SAMtools v1.9<sup>40</sup>. Insertions and deletions were called using CrispRVariants v1.12.0<sup>41</sup>.

### 309 **Statistical Analysis**

310 Comparison between development for guide analysis and mutation rates were evaluated  
311 using a linear model and statistical significance was determined using a Chi-square test. To analyze  
312 the level of mosaicism, an ANOVA test was used to determine significance between number of  
313 alleles per sample and percent wild type when injecting alongside Cas9 mRNA or protein. Samples  
314 with only wild type alleles were removed from analysis. Differences were considered significant  
315 when  $P < 0.05$ .

### 316 **Acknowledgements**

317 The authors would sincerely like to thank Ashley Young and Rebecca Ozeran for diligent  
318 collection and transport of ovaries from the processing plant to UC Davis. The library preparation  
319 and sequencing for off-target analysis were carried out at the DNA Technologies and Expression  
320 Analysis Cores at the UC Davis Genome Center, supported by NIH Shared Instrumentation Grant

321 1S10OD010786-01. The authors would like to thank the University of California Davis  
322 Bioinformatics Core Facility for assistance with data analysis. This project was supported by  
323 Biotechnology Risk Assessment Grant Program competitive grant no. 2015-33522-24106 from the  
324 U.S. Department of Agriculture, the Academic Federation Innovation Development Award at UC  
325 Davis, the Russell L. Rustici Rangeland and Cattle Research Endowment in the College of  
326 Agricultural and Environmental Science at UC Davis, the California Agricultural Experiment  
327 Station of the University of California, Davis, the Henry A. Jastro Research Fellowship in the  
328 College of Agricultural and Environmental Science at UC Davis and the National Institute for  
329 Food and Agriculture National Needs Graduate and Postgraduate Fellowship no. 2017-38420-  
330 26790 from the U.S. Department of Agriculture.

### 331 **Author's contribution**

332 SLH and JRO performed the experiments with additional input from PJR, ALV and JDM.  
333 SLH, JRO, JCL and AEY participated in sample processing and data analysis. SLH, JRO, ALV  
334 and JDM wrote the manuscript with suggestions from all the co-authors. All authors read and  
335 approved the final version.

### 336 **Competing Interests**

337 The authors declare no competing interests.

### 338 **Data Availability**

339 Raw sequence reads from PacBio Sequel II and Illumina MiSeq sequencing are available  
340 in the NCBI Sequence Read Archive as BioProject PRJNA623431 and SRA accession number  
341 SRR11850065. Individual results for the blastocyst development and mutation rate from each  
342 replicate (~ 30 embryos) of control and microinjected embryos are available in Supplementary  
343 Table S8.

344 **References**

- 345 1 Mehravar, M., Shirazi, A., Nazari, M. & Banan, M. Mosaicism in CRISPR/Cas9-mediated  
346 genome editing. *Dev Biol* **445**, 156-162, doi:10.1016/j.ydbio.2018.10.008 (2019).
- 347 2 Vilarino, M. *et al.* Mosaicism diminishes the value of pre-implantation embryo biopsies  
348 for detecting CRISPR/Cas9 induced mutations in sheep. *Transgenic Res* **27**, 525-537,  
349 doi:10.1007/s11248-018-0094-x (2018).
- 350 3 Mclean, Z., Oback, B. & Laible, G. Embryo-mediated genome editing for accelerated  
351 genetic improvement of livestock. *Frontiers of Agricultural Science and Engineering*,  
352 doi:doi: 10.15302/J-FASE-2019305 (2020).
- 353 4 Glass, Z., Lee, M., Li, Y. & Xu, Q. Engineering the Delivery System for CRISPR-Based  
354 Genome Editing. *Trends Biotechnol* **36**, 173-185, doi:10.1016/j.tibtech.2017.11.006  
355 (2018).
- 356 5 Teboul, L., Murray, S. A. & Nolan, P. M. Phenotyping first-generation genome editing  
357 mutants: a new standard? *Mamm Genome* **28**, 377-382, doi:10.1007/s00335-017-9711-  
358 x (2017).
- 359 6 Carlson, D. F. *et al.* Efficient TALEN-mediated gene knockout in livestock. *Proc Natl Acad*  
360 *Sci U S A* **109**, 17382-17387, doi:10.1073/pnas.1211446109 (2012).
- 361 7 Proudfoot, C. *et al.* Genome edited sheep and cattle. *Transgenic Res* **24**, 147-153,  
362 doi:10.1007/s11248-014-9832-x (2015).
- 363 8 Wei, J. *et al.* Efficient introgression of allelic variants by embryo-mediated editing of the  
364 bovine genome. *Sci Rep* **5**, 11735, doi:10.1038/srep11735 (2015).
- 365 9 Brinkman, E. K., Chen, T., Amendola, M. & van Steensel, B. Easy quantitative assessment  
366 of genome editing by sequence trace decomposition. *Nucleic acids research* **42**, e168-  
367 e168 (2014).
- 368 10 Vilarino, M. *et al.* CRISPR/Cas9 microinjection in oocytes disables pancreas development  
369 in sheep. *Sci Rep* **7**, 17472, doi:10.1038/s41598-017-17805-0 (2017).
- 370 11 Comizzoli, P., Marquant-Le Guienne, B., Heyman, Y. & Renard, J. P. Onset of the first S-  
371 phase is determined by a paternal effect during the G1-phase in bovine zygotes. *Biol*  
372 *Reprod* **62**, 1677-1684, doi:10.1095/biolreprod62.6.1677 (2000).
- 373 12 Lamas-Toranzo, I. *et al.* Strategies to reduce genetic mosaicism following CRISPR-  
374 mediated genome edition in bovine embryos. *Scientific Reports* **9**, 14900,  
375 doi:10.1038/s41598-019-51366-8 (2019).
- 376 13 Bishop, T. F. & Van Eenennaam, A. L. Genome editing approaches to augment livestock  
377 breeding programs. *J Exp Biol* **223**, doi:10.1242/jeb.207159 (2020).
- 378 14 Van Eenennaam, A. L., Wells, K. D. & Murray, J. D. Proposed U.S. regulation of gene-  
379 edited food animals is not fit for purpose. *NPJ Sci Food* **3**, 3, doi:10.1038/s41538-019-  
380 0035-y (2019).
- 381 15 Hsu, P. D. *et al.* DNA targeting specificity of RNA-guided Cas9 nucleases. *Nat Biotechnol*  
382 **31**, 827-832, doi:10.1038/nbt.2647 (2013).
- 383 16 Doench, J. G. *et al.* Optimized sgRNA design to maximize activity and minimize off-target  
384 effects of CRISPR-Cas9. *Nat Biotechnol* **34**, 184-191, doi:10.1038/nbt.3437 (2016).
- 385 17 Haeussler, M. *et al.* Evaluation of off-target and on-target scoring algorithms and  
386 integration into the guide RNA selection tool CRISPOR. *Genome Biol* **17**, 148,  
387 doi:10.1186/s13059-016-1012-2 (2016).



- 388 18 Jamal, M. *et al.* Keeping CRISPR/Cas on-Target. *Current Issues in Molecular Biology* **20**, 1-  
389 12, doi:10.21775/cimb.020.001 (2016).
- 390 19 Cong, L. *et al.* Multiplex genome engineering using CRISPR/Cas systems. *Science* **339**,  
391 819-823, doi:10.1126/science.1231143 (2013).
- 392 20 Mali, P. *et al.* RNA-guided human genome engineering via Cas9. *Science* **339**, 823-826,  
393 doi:10.1126/science.1232033 (2013).
- 394 21 Pattanayak, V. *et al.* High-throughput profiling of off-target DNA cleavage reveals RNA-  
395 programmed Cas9 nuclease specificity. *Nat Biotechnol* **31**, 839-843,  
396 doi:10.1038/nbt.2673 (2013).
- 397 22 Jinek, M. *et al.* A programmable dual-RNA-guided DNA endonuclease in adaptive  
398 bacterial immunity. *Science* **337**, 816-821 (2012).
- 399 23 Anderson, E. M. *et al.* Systematic analysis of CRISPR-Cas9 mismatch tolerance reveals  
400 low levels of off-target activity. *J Biotechnol* **211**, 56-65,  
401 doi:10.1016/j.jbiotec.2015.06.427 (2015).
- 402 24 Elvik, C. G. *et al.* The genome sequence of taurine cattle: a window to ruminant biology  
403 and evolution. *Science* **324**, 522-528, doi:10.1126/science.1169588 (2009).
- 404 25 Rosen, B. D. *et al.* De novo assembly of the cattle reference genome with single-  
405 molecule sequencing. *Gigascience* **9**, doi:10.1093/gigascience/giaa021 (2020).
- 406 26 Hayes, B. J. & Daetwyler, H. D. 1000 Bull Genomes Project to Map Simple and Complex  
407 Genetic Traits in Cattle: Applications and Outcomes. *Annu Rev Anim Biosci* **7**, 89-102,  
408 doi:10.1146/annurev-animal-020518-115024 (2019).
- 409 27 Veres, A. *et al.* Low incidence of off-target mutations in individual CRISPR-Cas9 and  
410 TALEN targeted human stem cell clones detected by whole-genome sequencing. *Cell*  
411 *Stem Cell* **15**, 27-30, doi:10.1016/j.stem.2014.04.020 (2014).
- 412 28 Yang, L. *et al.* Targeted and genome-wide sequencing reveal single nucleotide variations  
413 impacting specificity of Cas9 in human stem cells. *Nat Commun* **5**, 5507,  
414 doi:10.1038/ncomms6507 (2014).
- 415 29 Luo, X. *et al.* Trio deep-sequencing does not reveal unexpected off-target and on-target  
416 mutations in Cas9-edited rhesus monkeys. *Nat Commun* **10**, 5525, doi:10.1038/s41467-  
417 019-13481-y (2019).
- 418 30 Iyer, V. *et al.* Off-target mutations are rare in Cas9-modified mice. *Nat Methods* **12**, 479,  
419 doi:10.1038/nmeth.3408 (2015).
- 420 31 Willi, R., Smith, H. E., Wang, C., Liu, C. & Hennighausen, L. Mutation frequency is not  
421 increased in CRISPR-Cas9-edited mice. *Nature Methods* **15**, 756-758 (2018).
- 422 32 Aach, J., Mali, P. & Church, G. M. CasFinder: Flexible algorithm for identifying specific  
423 Cas9 targets in genomes. *bioRxiv*, doi:10.1101/005074 (2014).
- 424 33 Chari, R., Yeo, N. C., Chavez, A. & Church, G. M. sgRNA Scorer 2.0: A Species-  
425 Independent Model To Predict CRISPR/Cas9 Activity. *ACS Synth Biol* **6**, 902-904,  
426 doi:10.1021/acssynbio.6b00343 (2017).
- 427 34 Bae, S., Park, J. & Kim, J. S. Cas-OFFinder: a fast and versatile algorithm that searches for  
428 potential off-target sites of Cas9 RNA-guided endonucleases. *Bioinformatics* **30**, 1473-  
429 1475, doi:10.1093/bioinformatics/btu048 (2014).

- 430 35 Bakhtari, A. & Ross, P. J. DPPA3 prevents cytosine hydroxymethylation of the maternal  
431 pronucleus and is required for normal development in bovine embryos. *Epigenetics* **9**,  
432 1271-1279, doi:10.4161/epi.32087 (2014).
- 433 36 Bogliotti, Y. S., Vilarino, M. & Ross, P. J. Laser-assisted Cytoplasmic Microinjection in  
434 Livestock Zygotes. *J Vis Exp*, doi:10.3791/54465 (2016).
- 435 37 Koressaar, T. & Remm, M. Enhancements and modifications of primer design program  
436 Primer3. *Bioinformatics* **23**, 1289-1291, doi:10.1093/bioinformatics/btm091 (2007).
- 437 38 Untergasser, A. *et al.* Primer3--new capabilities and interfaces. *Nucleic Acids Res* **40**,  
438 e115, doi:10.1093/nar/gks596 (2012).
- 439 39 Li, H. Aligning sequence reads, clone sequences and assembly contigs with BWA-MEM.  
440 *arXiv* **1303.3997v** (2013).
- 441 40 Li, H. *et al.* The Sequence Alignment/Map format and SAMtools. *Bioinformatics* **25**,  
442 2078-2079, doi:10.1093/bioinformatics/btp352 (2009).
- 443 41 Lindsay, H. *et al.* CrisprVariants charts the mutation spectrum of genome engineering  
444 experiments. *Nat Biotechnol* **34**, 701-702, doi:10.1038/nbt.3628 (2016).
- 445 42 Petersen, B. *et al.* Efficient production of biallelic GGTA1 knockout pigs by cytoplasmic  
446 microinjection of CRISPR/Cas9 into zygotes. *Xenotransplantation* **23**, 338-346,  
447 doi:10.1111/xen.12258 (2016).
- 448 43 Zhang, X. *et al.* Disruption of the sheep BMPR-IB gene by CRISPR/Cas9 in in vitro-  
449 produced embryos. *Theriogenology* **91**, 163-172 e162,  
450 doi:10.1016/j.theriogenology.2016.10.025 (2017).
- 451 44 Crispo, M. *et al.* Efficient Generation of Myostatin Knock-Out Sheep Using CRISPR/Cas9  
452 Technology and Microinjection into Zygotes. *PLoS One* **10**, e0136690,  
453 doi:10.1371/journal.pone.0136690 (2015).
- 454 45 Tao, L. *et al.* Efficient biallelic mutation in porcine parthenotes using a CRISPR-Cas9  
455 system. *Biochemical and Biophysical Research Communications* **476**, 225-229 (2016).
- 456 46 Wang, Y. *et al.* Efficient generation of gene-modified pigs via injection of zygote with  
457 Cas9/sgRNA. *Sci Rep* **5**, 8256, doi:10.1038/srep08256 (2015).
- 458 47 Daigneault, B. W., Rajput, S., Smith, G. W. & Ross, P. J. Embryonic POU5F1 is Required  
459 for Expanded Bovine Blastocyst Formation. *Sci Rep* **8**, 7753, doi:10.1038/s41598-018-  
460 25964-x (2018).
- 461 48 Namula, Z. *et al.* Genome mutation after the introduction of the gene editing by  
462 electroporation of Cas9 protein (GEEP) system into bovine putative zygotes. *In Vitro Cell*  
463 *Dev Biol Anim* **55**, 598-603, doi:10.1007/s11626-019-00385-w (2019).
- 464 49 Tanihara, F. *et al.* Effects of concentration of CRISPR/Cas9 components on genetic  
465 mosaicism in cytoplasmic microinjected porcine embryos. *Journal of Reproduction and*  
466 *Development* **65**, 209-214 (2019).
- 467 50 Tanihara, F. *et al.* Generation of a TP53-modified porcine cancer model by CRISPR/Cas9-  
468 mediated gene modification in porcine zygotes via electroporation. *PLoS One* **13**,  
469 e0206360, doi:10.1371/journal.pone.0206360 (2018).

472 **Legends**

473

474 **Table 1.** Number of zygotes reaching the blastocyst developmental stage following microinjection  
475 of either Cas9 mRNA or protein and gRNAs targeting three loci (POLLED, H11, and ZFX) on  
476 different chromosomes. *In vitro* fertilized bovine embryos were injected 18 hours post  
477 insemination, and the percentage of blastocysts with Cas9-induced mutations was determined by  
478 sequence analysis. Letters that differ in the same column are significantly different ( $P < 0.05$ ).

479

480 **Table 2.** Editing efficiencies, mosaicism, average number of alleles and percent wild type reads  
481 as determined by PacBio sequencing of 63 blastocysts following microinjection of Cas9 mRNA  
482 or protein alongside gRNAs targeting three loci (POLLED, H11, and ZFX) on different  
483 chromosomes. *In vitro* fertilized bovine embryos were injected 18 hours post insemination. Letters  
484 that differ in the same column are significantly different ( $P < 0.05$ ). SEM = standard error of the  
485 mean.

486

487 **Table 3.** Published results of genome editing targeting the NHEJ pathway in livestock zygotes,  
488 and rates of mosaicism (where available). Modified from Mclean et al.<sup>3</sup>. <sup>a</sup>Transcription activator-  
489 like effector (TALE), zinc finger (ZF). <sup>b</sup>Nuclease delivered as plasmid, mRNA, or  
490 ribonucleoprotein (RNP) complex. <sup>c</sup>Cytoplasmic injection (CI) or electroporation (E). <sup>d</sup>*In vitro*  
491 fertilized (IVF) or parthenogenetic (PG) embryos. <sup>e</sup> normalized on the total number of edited  
492 embryos or not determined (ND).

493

494 **Figure 1.** Percentage of uninjected control and microinjected zygotes reaching the blastocyst  
495 developmental stage following microinjection of either Cas9 mRNA or protein into *in vitro*  
496 fertilized bovine embryos 18 hours post insemination, and percentage analyzed blastocysts with  
497 Cas9-induced mutations. (a) Blastocyst developmental percentage of CRISPR injected zygotes  
498 for all three loci compared to control non-injected zygotes. (b) Percentage of blastocysts with  
499 Cas9-induced mutations when injecting either Cas9 mRNA or protein alongside gRNAs  
500 targeting all three loci. (c) Percentage of blastocysts with Cas9 mRNA or protein-induced  
501 mutation by and gRNAs targeting three loci (POLLED, H11, and ZFX) in the bovine genome.  
502 Error bars = standard error of the mean. (d) Average number of alleles per blastocyst when  
503 injecting Cas9 mRNA or protein targeting three loci (POLLED, H11, and ZFX) in the bovine  
504 genome. \*P < 0.05 \*\*P < 0.005 \*\*\*P < 0.0005.

505

506 **Figure 2.** Bar graph depicting the percentage of alleles determined by PacBio sequencing in each  
507 of the 62 blastocysts microinjected 18 hours post insemination with either Cas9 mRNA or protein  
508 and gRNAs targeting the POLLED, H11 and ZFX loci. For ZFX locus: dotted bars are female;  
509 solid bars are male.

510 **Tables and Figures**

511 **Table 1.** Number of zygotes reaching the blastocyst developmental stage following microinjection  
512 of either Cas9 mRNA or protein and gRNAs targeting three loci (POLLED, H11, and ZFX) on  
513 different chromosomes. *In vitro* fertilized bovine embryos were injected 18 hours post  
514 insemination, and the percentage of blastocysts with Cas9-induced mutations was determined by  
515 sequence analysis. Letters that differ in the same column are significantly different ( $P < 0.05$ ).  
516

| <b>Cas9</b> | <b>gRNA</b> | <b>Injected<br/>Groups</b> | <b>Total<br/>Embryos</b> | <b>Total<br/>Blasts (%)</b> | <b>Total<br/>Analyzed</b> | <b>Total<br/>Mutation (%)</b> |
|-------------|-------------|----------------------------|--------------------------|-----------------------------|---------------------------|-------------------------------|
| mRNA        | control     | -                          | 492                      | 131 (27) <sup>a</sup>       | -                         | -                             |
|             | POLLED      | 4                          | 109                      | 21 (19) <sup>b</sup>        | 22                        | 16 (73) <sup>a</sup>          |
|             | H11         | 7                          | 191                      | 28 (15) <sup>b</sup>        | 27                        | 19 (70) <sup>a</sup>          |
|             | ZFX         | 14                         | 372                      | 60 (16) <sup>b</sup>        | 62                        | 41 (67) <sup>a</sup>          |
| protein     | control     | -                          | 749                      | 250 (33) <sup>a</sup>       | -                         | -                             |
|             | POLLED      | 12                         | 316                      | 53 (17) <sup>b</sup>        | 42                        | 36 (86) <sup>b</sup>          |
|             | H11         | 6                          | 162                      | 27 (17) <sup>b</sup>        | 39                        | 35 (90) <sup>b</sup>          |
|             | ZFX         | 22                         | 562                      | 91 (16) <sup>b</sup>        | 90                        | 73 (81) <sup>b</sup>          |

517

518 **Table 2.** Editing efficiencies, mosaicism, average number of alleles and percent wild type reads as determined by PacBio sequencing of  
 519 63 blastocysts following microinjection of Cas9 mRNA or protein alongside gRNAs targeting three loci (POLLED, H11, and ZFX) on  
 520 different chromosomes. *In vitro* fertilized bovine embryos were injected 18 hours post insemination. Letters that differ in the same  
 521 column are significantly different ( $P < 0.05$ ). SEM = standard error of the mean.

| <b>Locus</b> | <b>n</b> | <b>Cas9</b> | <b>% non-edited</b> | <b>% edited<br/>non-mosaic</b> | <b>% mosaic<br/>embryos</b> | <b>Alleles</b>   | <b>SEM</b> | <b>% Wild Type</b> | <b>SEM</b> |
|--------------|----------|-------------|---------------------|--------------------------------|-----------------------------|------------------|------------|--------------------|------------|
| POLLED       | 10       | mRNA        | 0.0                 | 0.0                            | 100.0                       | 5.4 <sup>a</sup> | ±0.365     | 42.5 <sup>a</sup>  | ±7.52      |
|              | 7        | protein     | 0.0                 | 14.3                           | 85.7                        | 3.0 <sup>b</sup> | ±0.398     | 9.1 <sup>b</sup>   | ±8.11      |
| H11          | 11       | mRNA        | 36.4                | 0.0                            | 100.0                       | 5.1 <sup>a</sup> | ±0.396     | 70.9 <sup>a</sup>  | ±7.01      |
|              | 13       | protein     | 15.4                | 7.7                            | 92.3                        | 4.8 <sup>a</sup> | ±0.353     | 33.7 <sup>b</sup>  | ±6.69      |
| ZFX          | 12       | mRNA        | 25.0                | 0                              | 100.0                       | 5.1 <sup>a</sup> | ±0.375     | 79.7 <sup>a</sup>  | ±6.94      |
|              | 9        | protein     | 11.1                | 11.1                           | 88.9                        | 4.5 <sup>a</sup> | ±0.386     | 43.5 <sup>b</sup>  | ±7.47      |

522

523 **Table 3.** Published results of genome editing targeting the NHEJ pathway in livestock zygotes, and rates of mosaicism (where  
524 available). Modified from Mclean et al.<sup>3</sup>. <sup>a</sup>Transcription activator-like effector (TALE), zinc finger (ZF). <sup>b</sup>Nuclease delivered as  
525 plasmid, mRNA, or ribonucleoprotein (RNP) complex. <sup>c</sup>Cytoplasmic injection (CI) or electroporation (E). <sup>d</sup>*In vitro* fertilized (IVF) or  
526 parthenogenetic (PG) embryos. <sup>e</sup>normalized on the total number of edited embryos or not determined (ND).  
527

| Nuclease <sup>a</sup> | Reagent <sup>b</sup> | Animal  | Delivery Method <sup>c</sup> | Delivery time (post IVF)/h <sup>d</sup> | Target locus               | Edited embryos % | Mosaic embryos % <sup>e</sup> | Edited offspring | Mosaic offspring | Reference |
|-----------------------|----------------------|---------|------------------------------|-----------------------------------------|----------------------------|------------------|-------------------------------|------------------|------------------|-----------|
| TALE                  | mRNA                 | Bovine  | CI                           | 19                                      | <i>ACAN</i> or <i>GDF8</i> | 52               | 20                            | -                | -                | 6         |
| TALE                  | mRNA                 | Bovine  | CI                           | 24                                      | <i>GDF8</i>                | 31-67            | ND                            | 3/4              | 1/3              | 7         |
| TALE                  | mRNA                 | Ovine   | CI                           | 24                                      | <i>GDF8</i>                | ND               | ND                            | 1/9              | 0/1              | 7         |
| ZF                    | Plasmid              | Bovine  | CI                           | 8                                       | <i>LGB</i>                 | 71               | 100                           | -                | -                | 8         |
| ZF                    | Plasmid              | Bovine  | CI                           | 18                                      | <i>LGB</i>                 | 83               | 100                           | -                | -                | 8         |
| ZF                    | mRNA                 | Bovine  | CI                           | 8                                       | <i>LGB</i>                 | 70               | 75                            | -                | -                | 8         |
| Cas9                  | Plasmid              | Porcine | CI                           | 17                                      | <i>GGTA1</i>               | ND               | ND                            | 11/12            | 4/11             | 42        |
| Cas9                  | mRNA                 | Ovine   | CI                           | 0                                       | <i>PDX1</i>                | 67               | 38                            | 2/4              | 2/2              | 10        |
| Cas9                  | mRNA                 | Ovine   | CI                           | 6                                       | <i>PDX1</i>                | 60               | 67                            | -                | -                | 10        |
| Cas9                  | mRNA                 | Ovine   | CI                           | 14                                      | <i>BMPR-IB</i>             | 38               | 86                            | -                | -                | 43        |
| Cas9                  | mRNA                 | Ovine   | CI                           | 22                                      | <i>MSTN</i>                | 50               | 80                            | 10/22            | 4/10             | 44        |
| Cas9                  | mRNA                 | Porcine | CI                           | 3                                       | <i>Tet1</i>                | 94               | 30                            | -                | -                | 45        |
| Cas9                  | mRNA                 | Porcine | CI                           | 8                                       | <i>Tet1</i>                | 100              | 33                            | -                | -                | 45        |
| Cas9                  | mRNA                 | Porcine | CI                           | 18                                      | <i>Tet1</i>                | 83               | 100                           | -                | -                | 45        |
| Cas9                  | mRNA                 | Porcine | CI                           | 17                                      | <i>Npc1l1</i>              | 88               | ND                            | 11/11            | 9/11             | 46        |
| Cas9                  | RNP                  | Bovine  | CI                           | 10 (IVF),<br>1 (PG)                     | <i>POU5F1</i>              | 86               | 34                            | -                | -                | 47        |
| Cas9                  | RNP                  | Bovine  | E                            | 10                                      | <i>GDF8</i>                | 27-67            | 75-100                        | -                | -                | 48        |
| Cas9                  | RNP                  | Bovine  | E                            | 15                                      | <i>GDF8</i>                | 19-67            | 92-100                        | -                | -                | 48        |
| Cas9                  | RNP                  | Porcine | CI                           | 0                                       | <i>GalT</i>                | 21               | 100                           | -                | -                | 49        |
| Cas9                  | RNP                  | Porcine | CI                           | 0 + 6                                   | <i>GalT</i>                | 23               | 100                           | -                | -                | 49        |
| Cas9                  | RNP                  | Porcine | CI                           | 6                                       | <i>GalT</i>                | 65               | 82                            | -                | -                | 49        |
| Cas9                  | RNP                  | Porcine | E                            | 12                                      | <i>TP53</i>                | 88               | 52                            | 6/9              | 5/6              | 50        |

528  
529

|      |      |        |    |    |                               |    |     |   |   |            |
|------|------|--------|----|----|-------------------------------|----|-----|---|---|------------|
| Cas9 | mRNA | Bovine | CI | 0  | <i>PAEP</i> or<br><i>CSN2</i> | 88 | 30  | - | - | 12         |
| Cas9 | RNP  | Bovine | CI | 0  |                               | 87 | 30  | - | - | 12         |
| Cas9 | RNP  | Bovine | CI | 10 |                               | 83 | 35  | - | - | 12         |
| Cas9 | mRNA | Bovine | CI | 20 |                               | 84 | 100 | - | - | 12         |
| Cas9 | RNP  | Bovine | CI | 20 |                               | 83 | 100 | - | - | 12         |
| Cas9 | mRNA | Bovine | CI | 18 | POLLED                        | 73 | 100 | - | - | This study |
| Cas9 | RNP  | Bovine | CI | 18 | POLLED                        | 86 | 86  | - | - | This study |
| Cas9 | mRNA | Bovine | CI | 18 | H11                           | 70 | 100 | - | - | This study |
| Cas9 | RNP  | Bovine | CI | 18 | H11                           | 90 | 91  | - | - | This study |
| Cas9 | mRNA | Bovine | CI | 18 | ZFX                           | 67 | 100 | - | - | This study |
| Cas9 | RNP  | Bovine | CI | 18 | ZFX                           | 81 | 88  | - | - | This study |

530



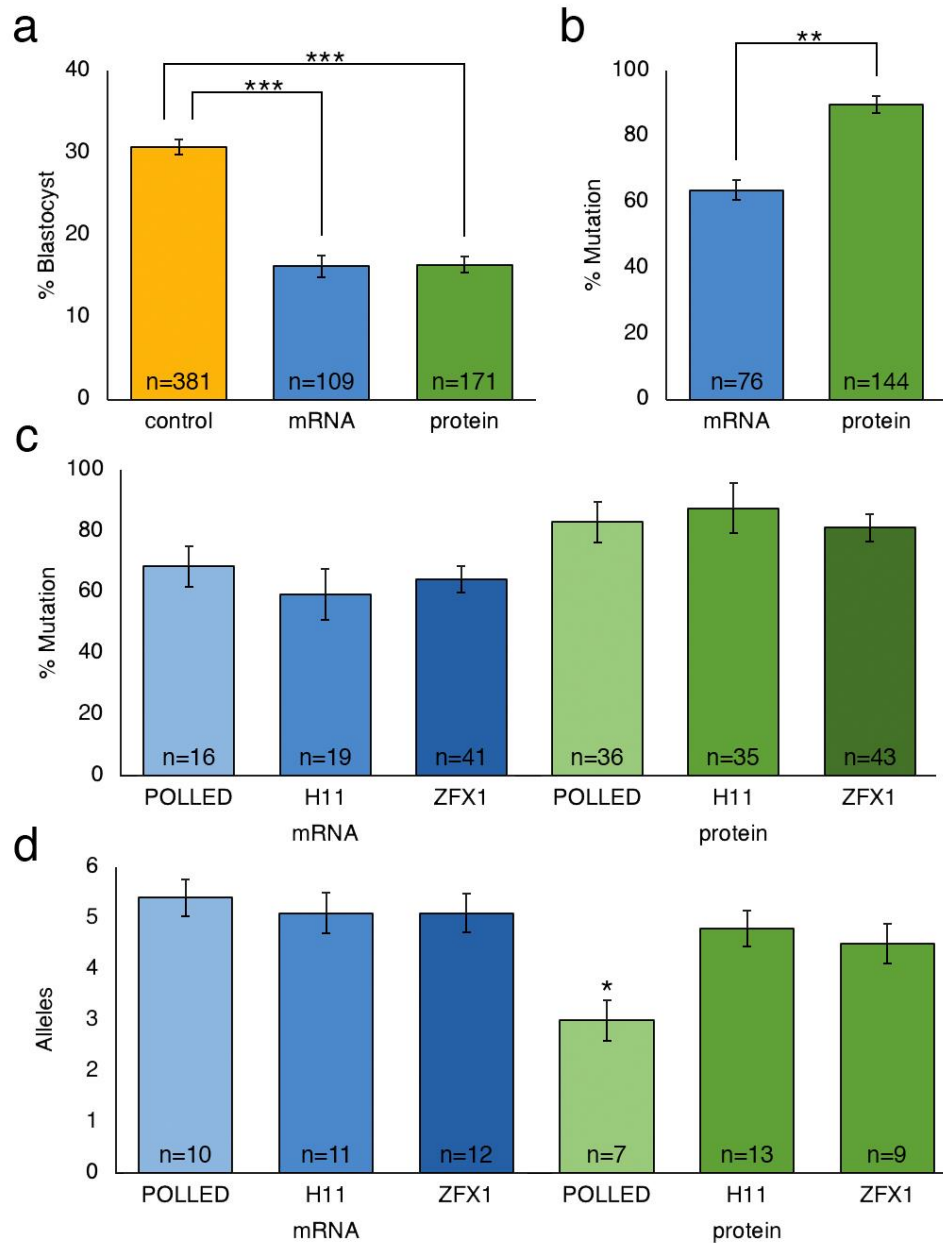

531

532 **Figure 1.** Percentage of uninjected control and microinjected zygotes reaching the blastocyst  
 533 developmental stage following microinjection of either Cas9 mRNA or protein into *in vitro*  
 534 fertilized bovine embryos 18 hours post insemination, and percentage analyzed blastocysts with  
 535 Cas9-induced mutations. (a) Blastocyst developmental percentage of CRISPR injected zygotes for  
 536 all three loci compared to control non-injected zygotes. (b) Percentage of blastocysts with Cas9-  
 537 induced mutations when injecting either Cas9 mRNA or protein alongside gRNAs targeting all  
 538 three loci. (c) Percentage of blastocysts with Cas9 mRNA or protein-induced mutation by and  
 539 gRNAs targeting three loci (POLLED, H11, and ZFX) in the bovine genome. Error bars = standard  
 540 error of the mean. (d) Average number of alleles per blastocyst when injecting Cas9 mRNA or  
 541 protein targeting three loci (POLLED, H11, and ZFX) in the bovine genome. \*P < 0.05 \*\*P <  
 542 0.005 \*\*\*P < 0.0005.

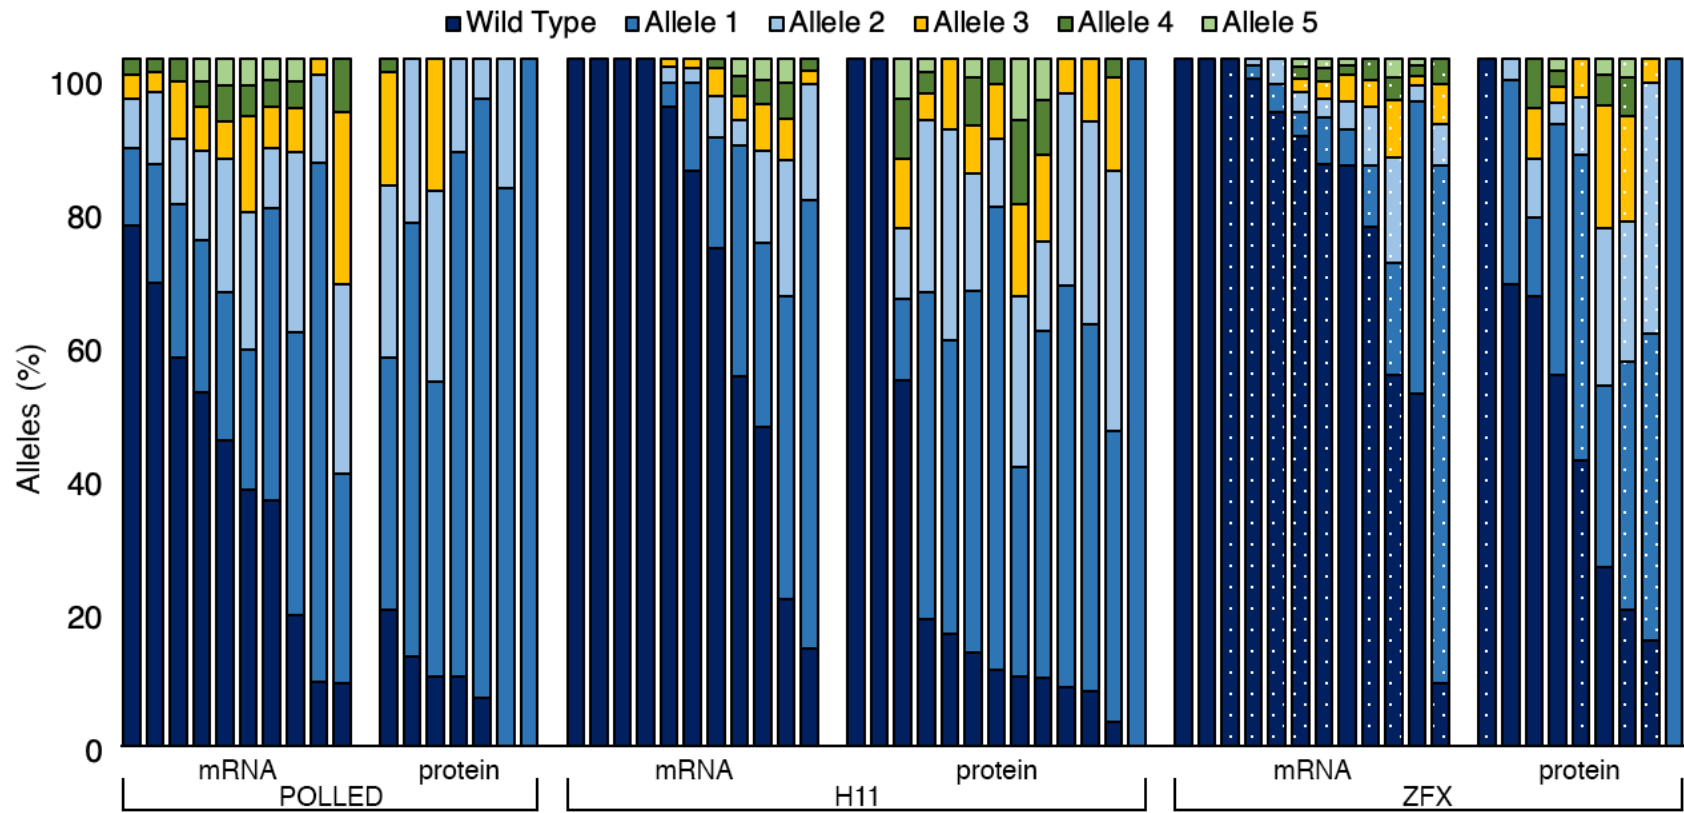

543  
544  
545  
546  
547

**Figure 2.** Bar graph depicting the percentage of alleles determined by PacBio sequencing in each of the 62 blastocysts microinjected 18 hours post insemination with either Cas9 mRNA or protein and gRNAs targeting the POLLED, H11 and ZFX loci. For ZFX locus: dotted bars are female; solid bars are male.

548 **Supplementary Data**

549 Evaluation of Mosaicism and Off Target Mutations in CRISPR-Mediated Genome Edited

550 Bovine Embryos

551

552 Sadie L. Hennig<sup>#1</sup>, Joseph R. Owen<sup>#1</sup>, Jason C. Lin<sup>1</sup>, Amy E. Young<sup>1</sup>, Pablo J. Ross<sup>1</sup>, Alison L.

553 Van Eenennaam<sup>1</sup> and James D. Murray<sup>1,2</sup>

554

555 <sup>1</sup>Department of Animal Science, University of California – Davis, Davis, CA, United States

556 <sup>2</sup>Department of Population Health and Reproduction, University of California – Davis, Davis, CA,

557 United States

558

559

560 **Supplementary Table S1.** Sequence of primers used for PCR amplification of the POLLED, H11,  
 561 or ZFX target regions, predicted off-target regions and gRNA sequences.

|                    | Name                 | Sequence 5' - 3'          | T <sub>m</sub> (°C) |
|--------------------|----------------------|---------------------------|---------------------|
| On-Target primers  | POLLEDgF             | GAAGTGTGGCCGGTAGAAAA      | 62.8                |
|                    | POLLEDgR             | CGCTCCTTCCAAAACAAAA       | 60.4                |
|                    | H11gF                | CCCCAGTGTTGTGCATGTAG      | 62.4                |
|                    | H11gR                | GTGAATGCCACTGCTGTGTT      | 60.4                |
|                    | ZFXgF                | AGCAGTGCTTCCAACTTGAG      | 60.6                |
|                    | ZFXgR                | GATGAGAGCTTATGTA ACTGTTGG | 61.2                |
| Off-Target primers | POLLEDoFF1F          | CAACTTCCCAGCTGTCTGC       | 59.0                |
|                    | POLLEDoFF1R          | CCTTGTATGACGGCAACCTT      | 59.0                |
|                    | POLLEDoFF2F          | TTCACTGCTCAAGGAAATGC      | 58.4                |
|                    | POLLEDoFF2R          | AAGGCTATGAACTTGGGCTTT     | 58.7                |
|                    | POLLEDoFF3F          | TTAAGCTTGGGCGTCTGAGT      | 59.0                |
|                    | POLLEDoFF3R          | CATTTGGCTTTCGGCTACAC      | 59.0                |
|                    | POLLEDoFF4F          | GAGGCAGATTTTGGCTTCAG      | 60.4                |
|                    | POLLEDoFF4R          | GCCTCTGTCCACATGCTCTT      | 62.4                |
|                    | POLLEDoFF5F          | CAGAGTCGGACACGACTGAA      | 62.4                |
|                    | POLLEDoFF5R          | GCTGTGTCCTCCTAGGCTCA      | 64.5                |
|                    | POLLEDoFF6F          | AAGGTTGTGTTGCATGTTGG      | 59.0                |
|                    | POLLEDoFF6R          | AATCCACTCCTCCAGAATCA      | 59.0                |
|                    | POLLEDoFF7F          | TCTGGCATCACAGCATTTGT      | 58.4                |
|                    | POLLEDoFF7R          | AAGATGCAAGAGACGCAGGT      | 60.4                |
|                    | POLLEDoFF8F          | TTGGCCATGGACCTATGATT      | 59.0                |
|                    | POLLEDoFF8R          | GGAGTGACATGGCACCTCATA     | 59.0                |
|                    | H11off1F             | GGAACAAAGATCCCACATGC      | 59.0                |
|                    | H11off1R             | GGCAGTCAAACCCAAACAC       | 59.0                |
|                    | H11off2F             | GAATTCTGGGGGCATTGAC       | 60.2                |
|                    | H11off2R             | GAAGCCTAACCACCTCCACA      | 62.4                |
|                    | H11off3F             | CTCAGCTGGGTAACATGCAA      | 60.4                |
|                    | H11off3R             | GAGCAAATTGAGGTGGGTAA      | 58.4                |
|                    | H11off4F             | AATAAACCCCAATTTGGCTA      | 56.7                |
|                    | H11off4R             | GGAATATCCCCTGGAGAAGG      | 64.5                |
|                    | H11off5F             | AGCCAGAGCTACTTGCTGGT      | 62.4                |
|                    | H11off5R             | AGGGTTCACTCTTGTGGTG       | 60.4                |
|                    | H11off6F             | TGAATGGATAAGCTCCCTGTG     | 60.6                |
|                    | H11off6R             | GAATGGTCCAGTGGTTGTCC      | 62.4                |
|                    | H11off7F             | GGCAGAGAGGGAGAGAGACA      | 64.5                |
|                    | H11off7R             | TTGCCAGACATGAGAAGCAG      | 60.4                |
|                    | H11off8F             | CATGTAAATTTGGGGTTGT       | 57.0                |
|                    | H11off8R             | CCTTCTAATTCTTGTCTGTTGCTT  | 57.0                |
|                    | H11off9F             | CCTTGCAGATCAGCTCACAA      | 60.4                |
|                    | H11off9R             | AATGGCTTCTTCCCTCAGGA      | 60.4                |
| H11off10F          | GGCTTTTGTCTGTGCTGTTT | 58.4                      |                     |
| H11off10R          | TCAGAGGACCAGATGATGGA | 60.4                      |                     |

|                    |                                 |                                 |      |
|--------------------|---------------------------------|---------------------------------|------|
|                    | H11off11F                       | GCACCGGGAGTTAATGTGTAA           | 60.6 |
|                    | H11off11R                       | AAGGGACAAGGTGTGGACTG            | 62.4 |
|                    | ZFXoff1F                        | GCAGCACCCAGAGTATCTCC            | 64.5 |
|                    | ZFXoff1R                        | CCTGAGGTAGGGGGATTGTT            | 62.4 |
|                    | ZFXoff2F                        | CCCCACTCCAGTACTCTTGC            | 64.5 |
|                    | ZFXoff2R                        | TCCCGTGTTTTGTGTGATTT            | 56.3 |
|                    | ZFXoff3F                        | TCATCTGGGCTGTTCTGAAG            | 60.4 |
|                    | ZFXoff3R                        | AAGGTTCCCTGCCTGCTTTTT           | 58.4 |
|                    | ZFXoff4F                        | AAGGAAGGGGATTTTCTCCA            | 58.4 |
|                    | ZFXoff4R                        | CACAGGGCTTTCTCCTTGAG            | 62.4 |
|                    | ZFXoff5F                        | CAGCAAACCTTTTCAGTGAGCA          | 58.7 |
|                    | ZFXoff5R                        | TCCTCTCCTTTTTGGACATCA           | 58.7 |
| Barcode<br>Primers | BC1001F                         | CACATATCAGAGTGCGAGATCTCTCGAGGTT | 62.0 |
|                    | BC1001R                         | CACATATCAGAGTGCGGTAGTCGAATTCGTT | 62.0 |
|                    | BC1002F                         | ACACACAGACTGTGAGAGATCTCTCGAGGTT | 62.0 |
|                    | BC1002R                         | ACACACAGACTGTGAGGTAGTCGAATTCGTT | 62.0 |
|                    | BC1003F                         | ACACATCTCGTGAGAGAGATCTCTCGAGGTT | 62.0 |
|                    | BC1003R                         | ACACATCTCGTGAGAGGTAGTCGAATTCGTT | 62.0 |
|                    | BC1004F                         | CACGCACACACGCGCGAGATCTCTCGAGGTT | 62.0 |
|                    | BC1004R                         | CACGCACACACGCGCGGTAGTCGAATTCGTT | 62.0 |
|                    | BC1006F                         | CATATATATCAGCTGTAGATCTCTCGAGGTT | 62.0 |
|                    | BC1006R                         | CATATATATCAGCTGTGTAGTCGAATTCGTT | 62.0 |
|                    | BC1007F                         | TCTGTATCTCTATGTGAGATCTCTCGAGGTT | 62.0 |
|                    | BC1007R                         | TCTGTATCTCTATGTGGTAGTCGAATTCGTT | 62.0 |
|                    | BC1008F                         | ACAGTCGAGCGCTGCGAGATCTCTCGAGGTT | 62.0 |
|                    | BC1008R                         | ACAGTCGAGCGCTGCGGTAGTCGAATTCGTT | 62.0 |
|                    | BC1009F                         | ACACACGCGAGACAGAAGATCTCTCGAGGTT | 62.0 |
| BC1009R            | ACACACGCGAGACAGAGTAGTCGAATTCGTT | 62.0                            |      |
| BC1010F            | ACGCGCTATCTCAGAGAGATCTCTCGAGGTT | 62.0                            |      |
| BC1010R            | ACGCGCTATCTCAGAGGTAGTCGAATTCGTT | 62.0                            |      |
| Guide<br>RNA       | POLLEDg1                        | GTCTATCCCAAAGTGTGGG             | -    |
|                    | POLLEDg2                        | CCTGTGAAATGAAGAGTACG            | -    |
|                    | POLLEDg3                        | GATAGTTTTCTTGGTAGGC             | -    |
|                    | H11g1                           | TAGCCATAAGACTACCTAT             | -    |
|                    | H11g2                           | CTGGGGCAAAGTCAACAGT             | -    |
|                    | H11g3                           | TGACTGGGAGGAGGAAGCCA            | -    |
|                    | ZFXg1                           | GCTAGTGGGCTAATGCCAGA            | -    |
|                    | ZFXg2                           | GCCGTCTCTCTATAGCTCAG            | -    |
| ZFXg3              | TCTTACAAGGGTGATAGTAC            | -                               |      |

563 **Supplementary Table S2.** Mutation rate in embryos for each guide injected 18 hours post  
564 insemination alongside Cas9 protein analyzed using PCR and Sanger sequencing. Multiple guides  
565 were tested targeting each locus to obtain highest efficiency guide. Letters that differ in the same  
566 column are significantly different ( $P < 0.05$ ). Each chromosome independently tested using a two-  
567 by-two  $\chi^2$  test.

| <b>Allele</b> | <b>gRNA</b> | <b>Injected Embryos</b> | <b>Total Blastocysts (%)</b> | <b>Blastocysts Analyzed</b> | <b>Mutation Rate (%)</b> |
|---------------|-------------|-------------------------|------------------------------|-----------------------------|--------------------------|
| POLLED        | 1           | 47                      | 15 (32 <sup>a</sup> )        | 13                          | 0 (0) <sup>a</sup>       |
|               | 2           | 75                      | 14 (19 <sup>b</sup> )        | 13                          | 10 (77) <sup>b</sup>     |
|               | 3           | 90                      | 25 (28 <sup>a</sup> )        | 25                          | 2 (8) <sup>a</sup>       |
| H11           | 1           | 65                      | 12 (18 <sup>b</sup> )        | 12                          | 10 (83) <sup>b</sup>     |
|               | 2           | 45                      | 13 (29 <sup>a</sup> )        | 13                          | 5 (38) <sup>a</sup>      |
|               | 3           | 47                      | 10 (21 <sup>b</sup> )        | 10                          | 6 (60) <sup>ab</sup>     |
| ZFX           | 1           | 75                      | 22 (29 <sup>a</sup> )        | 19                          | 1 (5) <sup>a</sup>       |
|               | 2           | 86                      | 22 (26 <sup>a</sup> )        | 21                          | 5 (24) <sup>a</sup>      |
|               | 3           | 104                     | 18 (17 <sup>b</sup> )        | 18                          | 14 (78) <sup>b</sup>     |

568

569

570 **Supplementary Table S3.** List of sequencing barcodes used for PacBio sequencing for embryos  
 571 injected 18 hours post insemination with gRNAs targeting the POLLED, H11, and ZFX loci  
 572 alongside Cas9 mRNA or protein and corresponding reads per sample following sorting by  
 573 barcode. Red highlighted samples were removed from analysis due to insufficient read count.

| Locus  | Cas9    | Sample  | Forward Barcode | Reverse Barcode | Reads per Sample |
|--------|---------|---------|-----------------|-----------------|------------------|
| POLLED | mRNA    | 1       | BC1001F         | BC1001R         | 3359             |
|        |         | 2       | BC1001F         | BC1002R         | 1049             |
|        |         | 3       | BC1001F         | BC1003R         | 1446             |
|        |         | 4       | BC1001F         | BC1004R         | 1075             |
|        |         | 5       | BC1001F         | BC1006R         | 1118             |
|        |         | 6       | BC1001F         | BC1007R         | 598              |
|        |         | 7       | BC1001F         | BC1008R         | 472              |
|        |         | 8       | BC1001F         | BC1009R         | 2632             |
|        |         | 9       | BC1001F         | BC1010R         | 2662             |
|        |         | 10      | BC1002F         | BC1001R         | 2236             |
|        | protein | 1       | BC1002F         | BC1003R         | 24               |
|        |         | 2       | BC1002F         | BC1004R         | 276              |
|        |         | 3       | BC1002F         | BC1006R         | 812              |
|        |         | 4       | BC1002F         | BC1007R         | 654              |
|        |         | 5       | BC1002F         | BC1008R         | 12               |
|        |         | 6       | BC1002F         | BC1009R         | 543              |
|        |         | 7       | BC1002F         | BC1010R         | 1622             |
|        |         | 8       | BC1003F         | BC1001R         | 1445             |
| H11    | mRNA    | 1       | BC1003F         | BC1004R         | 3762             |
|        |         | 2       | BC1003F         | BC1006R         | 3910             |
|        |         | 3       | BC1003F         | BC1007R         | 1203             |
|        |         | 4       | BC1003F         | BC1008R         | 3111             |
|        |         | 5       | BC1003F         | BC1009R         | 3267             |
|        |         | 6       | BC1003F         | BC1010R         | 2745             |
|        |         | 7       | BC1004F         | BC1001R         | 7681             |
|        |         | 8       | BC1004F         | BC1002R         | 1624             |
|        |         | 9       | BC1004F         | BC1003R         | 1579             |
|        |         | 10      | BC1004F         | BC1004R         | 1552             |
|        |         | 11      | BC1004F         | BC1006R         | 1937             |
|        | protein | 1       | BC1004F         | BC1008R         | 37               |
|        |         | 2       | BC1004F         | BC1009R         | 1693             |
|        |         | 3       | BC1004F         | BC1010R         | 8                |
|        |         | 4       | BC1006F         | BC1001R         | 6795             |
|        |         | 5       | BC1006F         | BC1002R         | 1197             |
|        |         | 6       | BC1006F         | BC1003R         | 1567             |
|        |         | 7       | BC1006F         | BC1004R         | 1926             |
| 8      | BC1006F | BC1006R | 2045            |                 |                  |

| <b>Locus</b> | <b>Cas9</b> | <b>Sample</b> | <b>Forward Barcode</b> | <b>Reverse Barcode</b> | <b>Reads per Sample</b> |
|--------------|-------------|---------------|------------------------|------------------------|-------------------------|
| H11          | protein     | 9             | BC1006F                | BC1007R                | 1108                    |
|              |             | 10            | BC1006F                | BC1008R                | 1472                    |
|              |             | 11            | BC1006F                | BC1009R                | 1213                    |
|              |             | 12            | BC1006F                | BC1010R                | 1937                    |
|              |             | 13            | BC1007F                | BC1001R                | 2163                    |
|              |             | 14            | BC1007F                | BC1002R                | 1838                    |
|              |             | 15            | BC1007F                | BC1003R                | 1500                    |
| ZFX          | mRNA        | 1             | BC1007F                | BC1007R                | 1630                    |
|              |             | 2             | BC1007F                | BC1008R                | 1603                    |
|              |             | 3             | BC1007F                | BC1009R                | 3973                    |
|              |             | 4             | BC1007F                | BC1010R                | 3531                    |
|              |             | 5             | BC1008F                | BC1001R                | 4960                    |
|              |             | 6             | BC1008F                | BC1002R                | 1720                    |
|              |             | 7             | BC1008F                | BC1003R                | 1521                    |
|              |             | 8             | BC1008F                | BC1004R                | 1530                    |
|              |             | 9             | BC1008F                | BC1006R                | 1039                    |
|              |             | <b>10</b>     | <b>BC1008F</b>         | <b>BC1007R</b>         | <b>17</b>               |
|              |             | 11            | BC1008F                | BC1008R                | 2037                    |
|              |             | 12            | BC1008F                | BC1009R                | 1484                    |
|              |             | 13            | BC1008F                | BC1010R                | 1614                    |
|              | protein     | 1             | BC1009F                | BC1001R                | 4954                    |
|              |             | 2             | BC1009F                | BC1002R                | 1240                    |
|              |             | <b>3</b>      | <b>BC1009F</b>         | <b>BC1003R</b>         | <b>27</b>               |
|              |             | 4             | BC1009F                | BC1004R                | 1564                    |
|              |             | 5             | BC1009F                | BC1006R                | 1280                    |
|              |             | 6             | BC1009F                | BC1007R                | 1324                    |
|              |             | 7             | BC1009F                | BC1008R                | 2102                    |
|              |             | 8             | BC1009F                | BC1009R                | 2304                    |
|              |             | <b>9</b>      | <b>BC1009F</b>         | <b>BC1010R</b>         | <b>74</b>               |
| 10           |             | BC1010F       | BC1001R                | 4014                   |                         |
| 11           | BC1010F     | BC1002R       | 1812                   |                        |                         |



575 **Supplementary Table S4.** Number of PacBio sequencing reads of PCR products from 69  
576 blastocysts microinjected with Cas9 editing reagents targeting three loci (POLLED, H11, and  
577 ZFX) in the bovine genome, and the percentage of reads that were <700 bp read length, and  
578 additionally had a unique blastocyst sample identifying barcode.  
579

| <b>Filtered<br/>By</b> | <b>Locus</b> | <b>Passed</b> | <b>Total</b> | <b>Percent</b> |
|------------------------|--------------|---------------|--------------|----------------|
| Read length            | Total        | 171,545       | 236,518      | 72.5           |
| Barcode                | POLLED       | 22,416        | 26,460       | 84.7           |
| Barcode                | H11          | 58,815        | 78,305       | 75.1           |
| Barcode                | ZFX          | 47,236        | 66,780       | 70.7           |

580

581 **Supplementary Table S5.** Prevalence of different allele types from PacBio sequencing of targeted PCR products < 700 bp from 69  
582 blastocysts microinjected with Cas9 editing reagents targeting three loci (POLLED, H11, and ZFX) in the bovine genome. Types of  
583 mutations = location relative to the cut site (3bp upstream of the PAM sequence): type of deletion; D = deletion, I = insertion. “Other”  
584 mutations indicate those with reads too few to report.  
585

| Locus  | Total Number of Reads | Wild Type Alleles (%) | Type of Mutation |                |               |               |              |
|--------|-----------------------|-----------------------|------------------|----------------|---------------|---------------|--------------|
|        |                       |                       | # of Reads (%)   |                |               |               |              |
| POLLED | 26460                 | 12719 (48)            | <b>-16:7D</b>    | <b>-14:11D</b> | <b>-13:4D</b> | <b>-10:1I</b> | <b>Other</b> |
|        |                       |                       | 1672 (6)         | 1751 (7)       | 6356 (24)     | 2250 (19)     | 1712 (6)     |
| H11    | 78305                 | 59302 (76)            | <b>-14:11D</b>   | <b>-13:6D</b>  | <b>-12:3D</b> | <b>-10:1D</b> | <b>-8:1D</b> |
|        |                       |                       | 3246 (4)         | 3813 (5)       | 4091 (5)      | 5061 (6)      | 2792 (4)     |
| ZFX    | 66780                 | 47939 (71)            | <b>-10:14D</b>   | <b>-4:9D</b>   | <b>-1:3D</b>  | <b>1:1I</b>   | <b>2:1I</b>  |
|        |                       |                       | 4222 (6)         | 2998 (4)       | 3198 (5)      | 2194 (3)      | 6532 (10)    |

586  
587

588 **Supplementary Table S6.** Number of alleles and percentage of each corresponding allele per sample detected at the cut-site of Cas9  
589 mRNA or protein injected embryos. WT = percentage of reads that were wild type sequence. Alleles 1-5 are percent reads with each of  
590 the alleles found in the samples. Bold samples contained no wild type sequence. n/a = not applicable; genotypic sex was only determined  
591 for samples targeting the X chromosome.

| Locus  | Cas9    | Sample   | Sex | # of alleles | % of Reads for Each Allele |            |           |          |          |          |
|--------|---------|----------|-----|--------------|----------------------------|------------|-----------|----------|----------|----------|
|        |         |          |     |              | WT                         | Allele 1   | Allele 2  | Allele 3 | Allele 4 | Allele 5 |
| POLLED | mRNA    | 1        | n/a | 5            | 57                         | 22         | 10        | 8        | 3        | -        |
|        |         | 2        | n/a | 5            | 76                         | 11         | 7         | 4        | 2        | -        |
|        |         | 3        | n/a | 6            | 37                         | 44         | 9         | 6        | 4        | 3        |
|        |         | 4        | n/a | 5            | 9                          | 31         | 28        | 25       | 8        | -        |
|        |         | 5        | n/a | 6            | 46                         | 22         | 20        | 6        | 6        | 4        |
|        |         | 6        | n/a | 5            | 67                         | 17         | 11        | 3        | 2        | -        |
|        |         | 7        | n/a | 4            | 9                          | 75         | 13        | 2        | -        | -        |
|        |         | 8        | n/a | 6            | 20                         | 43         | 27        | 7        | 4        | 3        |
|        |         | 9        | n/a | 6            | 53                         | 23         | 13        | 7        | 4        | 3        |
|        |         | 10       | n/a | 6            | 39                         | 21         | 21        | 15       | 5        | 4        |
|        | protein | 1        | n/a | 4            | 10                         | 43         | 28        | 19       | -        | -        |
|        |         | 2        | n/a | 3            | 13                         | 63         | 24        | -        | -        | -        |
|        |         | 3        | n/a | 3            | 7                          | 87         | 6         | -        | -        | -        |
|        |         | 4        | n/a | 3            | 10                         | 76         | 14        | -        | -        | -        |
|        |         | <b>5</b> | n/a | <b>2</b>     | -                          | <b>81</b>  | <b>19</b> | -        | -        | -        |
|        |         | 6        | n/a | 5            | 20                         | 37         | 25        | 16       | 2        | -        |
|        |         | <b>7</b> | n/a | <b>1</b>     | -                          | <b>100</b> | -         | -        | -        | -        |
| H11    | mRNA    | 1        | n/a | 6            | 54                         | 34         | 4         | 3        | 3        | 3        |
|        |         | 2        | n/a | 6            | 21                         | 44         | 20        | 6        | 5        | 4        |
|        |         | 3        | n/a | 5            | 14                         | 65         | 17        | 2        | 2        | -        |
|        |         | 4        | n/a | 6            | 46                         | 27         | 14        | 7        | 3        | 3        |
|        |         | 5        | n/a | 5            | 72                         | 16         | 6         | 4        | 2        | -        |
|        |         | 6        | n/a | 4            | 84                         | 13         | 2         | 1        | -        | -        |
|        |         | 7        | n/a | 4            | 93                         | 4          | 2         | 1        | -        | -        |
|        |         | 8        | n/a | 1            | 100                        | -          | -         | -        | -        | -        |

| Locus | Cas9    | Sample   | Sex    | # of alleles | % of Reads for Each Allele |            |          |          |          |          |
|-------|---------|----------|--------|--------------|----------------------------|------------|----------|----------|----------|----------|
|       |         |          |        |              | WT                         | Allele 1   | Allele 2 | Allele 3 | Allele 4 | Allele 5 |
| H11   | mRNA    | 9        | n/a    | 1            | 100                        | -          | -        | -        | -        | -        |
|       |         | 10       | n/a    | 1            | 100                        | -          | -        | -        | -        | -        |
|       |         | 11       | n/a    | 1            | 100                        | -          | -        | -        | -        | -        |
|       | protein | 1        | n/a    | 1            | 100                        | -          | -        | -        | -        | -        |
|       |         | 2        | n/a    | 6            | 53                         | 12         | 10       | 10       | 9        | 6        |
|       |         | 3        | n/a    | 6            | 10                         | 50         | 13       | 13       | 8        | 6        |
|       |         | 4        | n/a    | 6            | 14                         | 53         | 17       | 7        | 7        | 3        |
|       |         | 5        | n/a    | 1            | 100                        | -          | -        | -        | -        | -        |
|       |         | 6        | n/a    | 6            | 18                         | 48         | 25       | 4        | 3        | 2        |
|       |         | 7        | n/a    | 4            | 8                          | 54         | 29       | 9        | -        | -        |
|       |         | 8        | n/a    | 4            | 8                          | 59         | 28       | 5        | -        | -        |
|       |         | <b>9</b> | n/a    | <b>1</b>     | -                          | <b>100</b> | -        | -        | -        | -        |
|       |         | 10       | n/a    | 5            | 11                         | 67         | 10       | 8        | 4        | -        |
|       |         | 11       | n/a    | 6            | 10                         | 30         | 25       | 13       | 12       | 9        |
| 12    | n/a     | 5        | 4      | 42           | 38                         | 14         | 3        | -        |          |          |
| 13    | n/a     | 4        | 16     | 43           | 31                         | 10         | -        | -        |          |          |
| ZFX   | mRNA    | 1        | female | 5            | 9                          | 75         | 6        | 6        | 4        | -        |
|       |         | 2        | male   | 6            | 51                         | 43         | 2        | 1        | 1        | 1        |
|       |         | 3        | female | 5            | 76                         | 9          | 9        | 4        | 3        | -        |
|       |         | 4        | female | 3            | 97                         | 2          | 1        | -        | -        | -        |
|       |         | 5        | male   | 6            | 85                         | 5          | 4        | 4        | 1        | 1        |
|       |         | 6        | female | 6            | 54                         | 16         | 15       | 8        | 3        | 3        |
|       |         | 7        | male   | 1            | 100                        | -          | -        | -        | -        | -        |
|       |         | 8        | female | 3            | 92                         | 4          | 4        | -        | -        | -        |
|       |         | 9        | female | 6            | 85                         | 7          | 3        | 3        | 2        | 2        |
|       |         | 10       | female | 6            | 89                         | 4          | 3        | 2        | 2        | 1        |
|       |         | 11       | female | 1            | 100                        | -          | -        | -        | -        | -        |
|       |         | 12       | male   | 1            | 100                        | -          | -        | -        | -        | -        |
|       | protein | 1        | male   | 5            | 65                         | 12         | 8        | 7        | 7        | -        |

| Locus | Cas9    | Sample   | Sex    | # of alleles | % of Reads for Each Allele |            |          |          |          |          |
|-------|---------|----------|--------|--------------|----------------------------|------------|----------|----------|----------|----------|
|       |         |          |        |              | WT                         | Allele 1   | Allele 2 | Allele 3 | Allele 4 | Allele 5 |
| ZFX   | protein | 2        | male   | 6            | 54                         | 37         | 3        | 2        | 2        | 2        |
|       |         | 3        | female | 1            | 100                        | -          | -        | -        | -        | -        |
|       |         | 4        | female | 4            | 42                         | 44         | 8        | 6        | -        | -        |
|       |         | 5        | male   | 6            | 26                         | 26         | 23       | 18       | 5        | 2        |
|       |         | <b>6</b> | male   | <b>1</b>     | -                          | <b>100</b> | -        | -        | -        | -        |
|       |         | 7        | male   | 3            | 67                         | 30         | 3        | -        | -        | -        |
|       |         | 8        | female | 6            | 20                         | 36         | 20       | 16       | 6        | 3        |
|       |         | 9        | female | 4            | 15                         | 45         | 36       | 4        | -        | -        |

592  
593  
594

595 **Supplementary Table S7.** Predicted off-target sites for each of the three guides targeting the POLLED, H11, or ZFX locus. DNA =  
596 sequence of off-target site (lower case bases are mismatches). Position is relative to the start of the bosTau8 reference genome. Total  
597 reads aligned = number of reads mapped to the off-target sequence from overlapped MiSeq data. Coverage = reads per sample per target.

598

| Target Locus | Off-Target Chromosome | DNA                  | Position  | Direction | Total Reads Aligned | Coverage |
|--------------|-----------------------|----------------------|-----------|-----------|---------------------|----------|
| POLLED       | 2                     | CaTGTGAAAtGAAGAGTACc | 17859417  | +         | 301211              | 35X      |
|              | 10                    | CCTcTGgAATGAAGAGTACc | 23332597  | -         | 94118               | 11X      |
|              | 12                    | CCTGTGAAATGActAGTACa | 57833284  | +         | 256177              | 30X      |
|              | 14                    | CCTcTGAAATGAAGAGaACc | 83079285  | +         | 85603               | 10X      |
|              | 18                    | CCTGaGAAATGAAGAGgAtG | 34058298  | -         | 54877               | 6X       |
|              | 18                    | CtTGTGcAAaGAAGAGTACG | 46423386  | -         | 301211              | 35X      |
|              | X                     | CCTGTGAgATGAtGAtTACG | 31206746  | +         | 430923              | 51X      |
|              | X                     | gCTGTGAAATGAAGAGgAtG | 129076601 | +         | 713874              | 84X      |
| H11          | 1                     | TAGCCATAAGcaTACCaAT  | 3616887   | +         | 21658               | 2X       |
|              | 1                     | TAGCCATAAGtCaACaTAT  | 7454978   | +         | 1022399             | 97X      |
|              | 1                     | TAGCCAcAAGtCTACaTAT  | 12203491  | -         | 878840              | 84X      |
|              | 1                     | gAGaCATAAGACTACCcAT  | 111862587 | +         | 226674              | 22X      |
|              | 4                     | TAGCCATAAGaAaTtCCTAa | 102992457 | -         | 249056              | 24X      |
|              | 7                     | TAGCaATAAGAgTACCTAa  | 8578648   | -         | 162124              | 15X      |
|              | 7                     | TAGtCATAAttCTACCTAT  | 75383424  | -         | 12118               | 1X       |
|              | 7                     | aAGCCATAcaACTACCTAT  | 75200649  | -         | 265923              | 25X      |
|              | 8                     | TAGCCATcAGACTACCcAg  | 62416292  | -         | 717812              | 68X      |
|              | 10                    | TAGCCaAaAGACaACaTAT  | 59699661  | +         | 1104588             | 105X     |
|              | X                     | TAGCaATAAGAgTAaCTAT  | 125300735 | +         | 1179081             | 112X     |
| ZFX          | 7                     | TCTTAaAAGGGTGATAaTAt | 112332349 | +         | 125193              | 13X      |
|              | 12                    | TCTTACAgGaTGATAGTAC  | 22046100  | -         | 474201              | 47X      |
|              | 21                    | aaTTACAgGGGTGATAGTAC | 28506796  | -         | 470743              | 47X      |
|              | 21                    | TCTTACAAGaGTcATAGTgC | 48414495  | -         | 329628              | 33X      |
|              | 27                    | TCcTAgAAGGGTGATcGTAC | 8648733   | -         | 924826              | 92X      |

599 **Supplementary Table S8.** Results for development and mutation rate from each replicate of control embryos, and groups injected 18  
600 hours post insemination with gRNAs targeting the POLLED, H11, and ZFX loci alongside Cas9 mRNA or protein

| Locus  | Cas9    | # Embryos | # Blastocyst | % Blastocyst | # Blastocysts evaluated | # Blastocysts With mutation | % Mutation |
|--------|---------|-----------|--------------|--------------|-------------------------|-----------------------------|------------|
| POLLED | mRNA    | 30        | 7            | 23.3         | 7                       | 4                           | 57.1       |
| POLLED | mRNA    | 29        | 5            | 17.2         | 5                       | 3                           | 60         |
| POLLED | protein | 26        | 4            | 15.4         | 3                       | 3                           | 100        |
| POLLED | protein | 27        | 5            | 18.5         | 4                       | 3                           | 75         |
| POLLED | protein | 27        | 3            | 11.1         | 2                       | 2                           | 100        |
| POLLED | protein | 28        | 5            | 17.9         | 4                       | 3                           | 75         |
| POLLED | protein | 26        | 6            | 23.1         | 5                       | 4                           | 80         |
| POLLED | protein | 27        | 4            | 14.8         | 3                       | 2                           | 66.7       |
| POLLED | protein | 26        | 4            | 15.4         | 3                       | 3                           | 100        |
| POLLED | protein | 26        | 5            | 19.2         | 4                       | 3                           | 75         |
| POLLED | protein | 27        | 5            | 18.5         | 4                       | 3                           | 75         |
| POLLED | protein | 26        | 4            | 15.4         | 3                       | 3                           | 100        |
| H11    | mRNA    | 26        | 3            | 11.5         | 3                       | 2                           | 66.7       |
| H11    | mRNA    | 27        | 5            | 18.5         | 4                       | 3                           | 75         |
| H11    | mRNA    | 26        | 3            | 11.5         | 3                       | 2                           | 66.7       |
| H11    | mRNA    | 27        | 4            | 14.8         | 4                       | 3                           | 75         |
| H11    | mRNA    | 25        | 3            | 12           | 3                       | 2                           | 66.7       |
| H11    | protein | 26        | 4            | 15.4         | 3                       | 3                           | 100        |
| H11    | protein | 26        | 5            | 19.2         | 4                       | 3                           | 75         |
| H11    | protein | 24        | 3            | 12.5         | 3                       | 3                           | 100        |
| H11    | protein | 26        | 4            | 15.4         | 3                       | 3                           | 100        |
| ZFX    | mRNA    | 26        | 4            | 15.4         | 4                       | 3                           | 75         |
| ZFX    | mRNA    | 26        | 4            | 15.4         | 4                       | 2                           | 50         |
| ZFX    | mRNA    | 27        | 5            | 18.5         | 5                       | 3                           | 60         |
| ZFX    | mRNA    | 26        | 5            | 19.2         | 5                       | 3                           | 60         |
| ZFX    | mRNA    | 26        | 4            | 15.4         | 4                       | 3                           | 75         |
| ZFX    | mRNA    | 27        | 4            | 14.8         | 4                       | 2                           | 50         |
| ZFX    | mRNA    | 26        | 3            | 11.5         | 3                       | 2                           | 66.7       |
| ZFX    | mRNA    | 25        | 5            | 20           | 5                       | 4                           | 80         |

|         |         |    |    |      |   |   |      |
|---------|---------|----|----|------|---|---|------|
| ZFX     | mRNA    | 26 | 3  | 11.5 | 3 | 1 | 33.3 |
| ZFX     | mRNA    | 25 | 4  | 16   | 4 | 3 | 75   |
| ZFX     | mRNA    | 26 | 5  | 19.2 | 5 | 4 | 80   |
| ZFX     | mRNA    | 26 | 4  | 15.4 | 4 | 2 | 50   |
| ZFX     | protein | 26 | 4  | 15.4 | 4 | 3 | 75   |
| ZFX     | protein | 26 | 4  | 15.4 | 4 | 3 | 75   |
| ZFX     | protein | 27 | 5  | 18.5 | 5 | 4 | 80   |
| ZFX     | protein | 26 | 5  | 19.2 | 5 | 5 | 100  |
| ZFX     | protein | 26 | 4  | 15.4 | 4 | 3 | 75   |
| ZFX     | protein | 24 | 4  | 16.7 | 4 | 3 | 75   |
| ZFX     | protein | 26 | 3  | 11.5 | 3 | 3 | 100  |
| ZFX     | protein | 25 | 5  | 20   | 5 | 4 | 80   |
| ZFX     | protein | 26 | 3  | 11.5 | 3 | 2 | 66.7 |
| ZFX     | protein | 25 | 4  | 16   | 4 | 3 | 75   |
| ZFX     | protein | 26 | 5  | 19.2 | 5 | 4 | 80   |
| ZFX     | protein | 26 | 4  | 15.4 | 4 | 4 | 100  |
| ZFX     | protein | 26 | 4  | 15.4 | 4 | 3 | 75   |
| ZFX     | protein | 25 | 5  | 20   | 5 | 4 | 80   |
| ZFX     | protein | 25 | 4  | 16   | 4 | 3 | 75   |
| ZFX     | protein | 26 | 4  | 15.4 | 4 | 4 | 100  |
| ZFX     | protein | 24 | 3  | 12.5 | 3 | 2 | 66.7 |
| ZFX     | protein | 25 | 4  | 16   | 4 | 3 | 75   |
| ZFX     | protein | 26 | 4  | 15.4 | 4 | 3 | 75   |
| ZFX     | protein | 26 | 3  | 11.5 | 3 | 2 | 66.7 |
| control | -       | 30 | 9  | 30   | - | - | -    |
| control | -       | 30 | 8  | 26.7 | - | - | -    |
| control | -       | 30 | 7  | 23.3 | - | - | -    |
| control | -       | 30 | 6  | 20   | - | - | -    |
| control | -       | 30 | 13 | 43.3 | - | - | -    |
| control | -       | 30 | 8  | 26.7 | - | - | -    |
| control | -       | 30 | 10 | 33.3 | - | - | -    |
| control | -       | 29 | 9  | 31   | - | - | -    |
| control | -       | 30 | 8  | 26.7 | - | - | -    |
| control | -       | 30 | 13 | 43.3 | - | - | -    |



|         |   |    |    |      |   |   |   |
|---------|---|----|----|------|---|---|---|
| control | - | 30 | 8  | 26.7 | - | - | - |
| control | - | 30 | 9  | 30   | - | - | - |
| control | - | 30 | 7  | 23.3 | - | - | - |
| control | - | 30 | 8  | 26.7 | - | - | - |
| control | - | 27 | 9  | 33.3 | - | - | - |
| control | - | 30 | 10 | 33.3 | - | - | - |
| control | - | 30 | 8  | 26.7 | - | - | - |
| control | - | 30 | 5  | 16.7 | - | - | - |
| control | - | 29 | 7  | 24.1 | - | - | - |
| control | - | 30 | 6  | 20   | - | - | - |
| control | - | 30 | 8  | 26.7 | - | - | - |
| control | - | 29 | 9  | 31   | - | - | - |
| control | - | 30 | 8  | 26.7 | - | - | - |
| control | - | 30 | 14 | 46.7 | - | - | - |
| control | - | 30 | 8  | 26.7 | - | - | - |
| control | - | 28 | 13 | 46.4 | - | - | - |
| control | - | 30 | 8  | 26.7 | - | - | - |
| control | - | 30 | 7  | 23.3 | - | - | - |
| control | - | 29 | 8  | 27.6 | - | - | - |
| control | - | 30 | 9  | 30   | - | - | - |
| control | - | 30 | 12 | 40   | - | - | - |
| control | - | 30 | 11 | 36.7 | - | - | - |
| control | - | 30 | 9  | 30   | - | - | - |
| control | - | 28 | 9  | 32.1 | - | - | - |
| control | - | 30 | 10 | 33.3 | - | - | - |
| control | - | 30 | 13 | 43.3 | - | - | - |
| control | - | 30 | 7  | 23.3 | - | - | - |
| control | - | 26 | 8  | 30.8 | - | - | - |
| control | - | 27 | 9  | 33.3 | - | - | - |
| control | - | 30 | 12 | 40   | - | - | - |
| control | - | 29 | 11 | 37.9 | - | - | - |
| control | - | 30 | 10 | 33.3 | - | - | - |

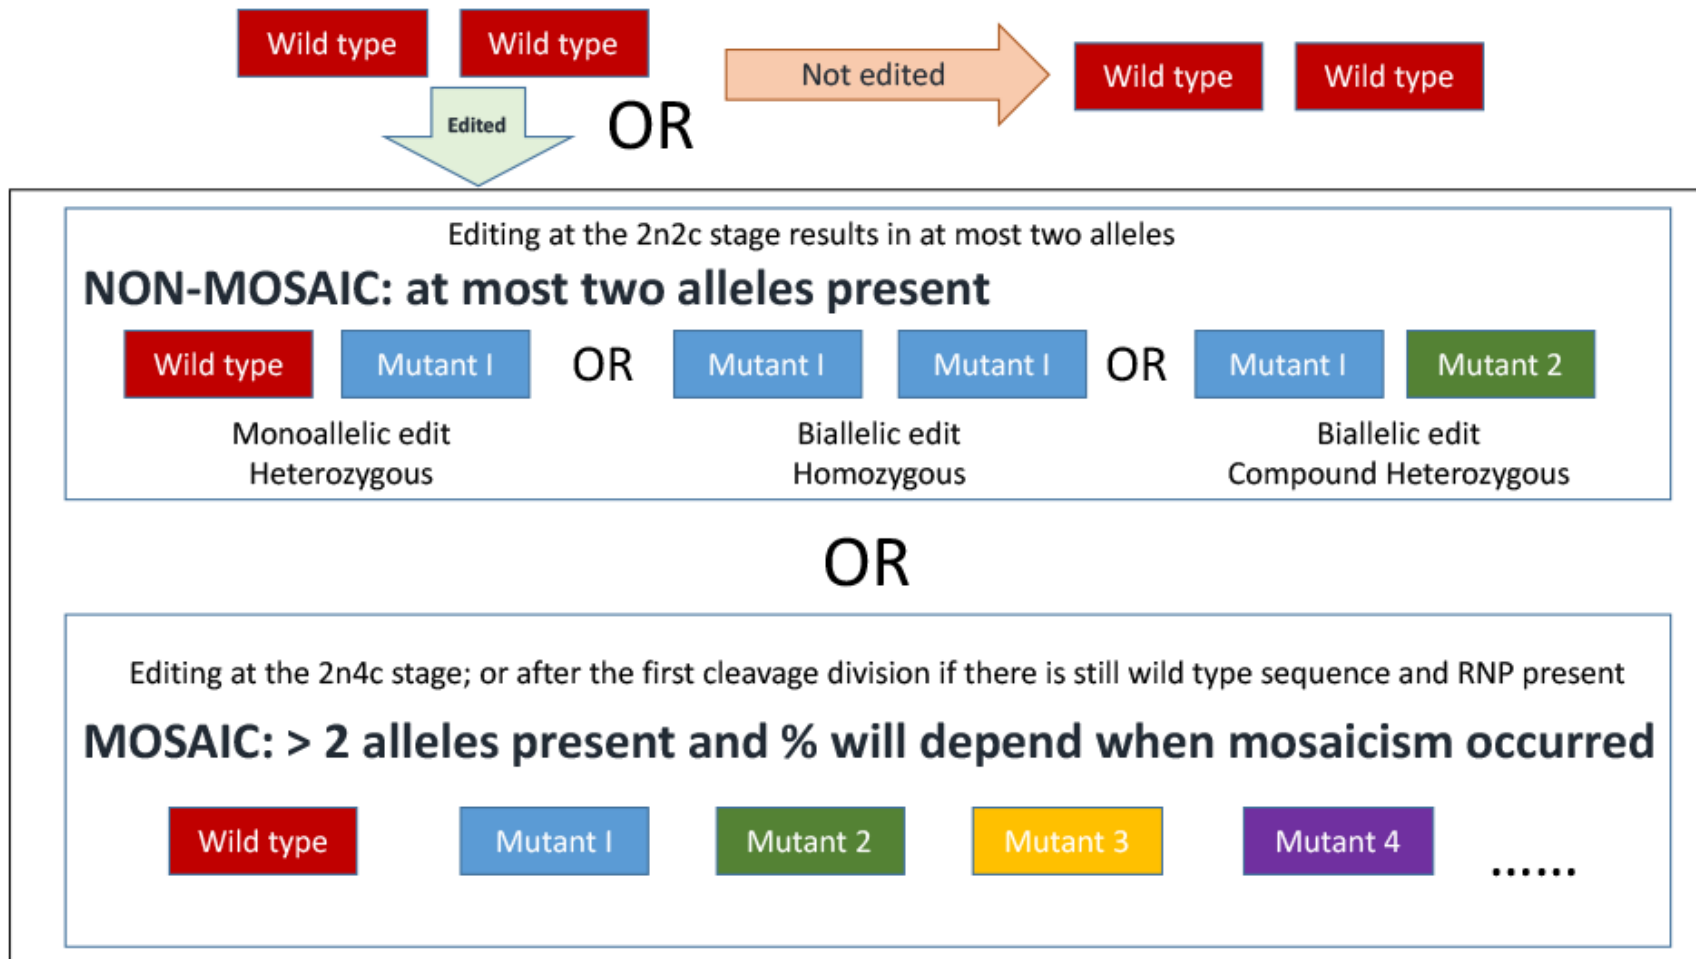

602  
603  
604  
605

**Supplementary Figure S1.** Schematic representation of possible outcomes from CRISPR-mediated mutation by cytoplasmic injection of an *in vitro* fertilized embryo 18 hours post insemination. 2n = number of homologous chromosomes, i.e. diploid. 2c/4c = number of copies of chromosomes either before DNA replication or after
